# Supplementary material
Source: Royal Society of Chemistry journal article supplement (doi:10.1039/d6fo00196c)
Supplement: d6fo00196c1.pdf [file d6fo00196c1.pdf]

## Associations between degree of food processing, inflammatory biomarkers and colorectal cancer survival: a prospective cohort study

### List of Supplementary Tables

|                  |                                                                                                                                                                                                                                                                                  |    |
|------------------|----------------------------------------------------------------------------------------------------------------------------------------------------------------------------------------------------------------------------------------------------------------------------------|----|
| <b>Table S1</b>  | Examples of food products in each food category according to the NOVA classification..                                                                                                                                                                                           | 3  |
| <b>Table S2</b>  | Baseline characteristics of cancer survivors by quartiles of NOVA 2 foods intake. ....                                                                                                                                                                                           | 4  |
| <b>Table S3</b>  | Baseline characteristics of cancer survivors by quartiles of NOVA 3 foods intake. ....                                                                                                                                                                                           | 6  |
| <b>Table S4</b>  | Baseline characteristics of cancer survivors by quartiles of NOVA 4 foods intake. ....                                                                                                                                                                                           | 8  |
| <b>Table S5</b>  | Percentile-based isotemporal substitution analyses (10-percentile change <sup>a</sup> ). ....                                                                                                                                                                                    | 10 |
| <b>Table S6</b>  | Hazard ratios (95% confidence intervals) for survival outcomes according to daily intake of NOVA 1–4 food groups (g/day) in the Guangdong Colorectal Cancer Cohort Study (further adjusted for a Dietary Guideline Adherence Score based on the Chinese Dietary Guidelines)..... | 11 |
| <b>Table S7</b>  | Hazard ratios (95% confidence intervals) for survival outcomes according to daily intake of NOVA 1–4 food groups (% energy) in the Guangdong Colorectal Cancer Cohort study. ....                                                                                                | 12 |
| <b>Figure S1</b> | Correlation between grams per day and % energy across NOVA 1-4 food groups. ....                                                                                                                                                                                                 | 14 |
| <b>Table S8</b>  | Cross-classification of NOVA 1-4 food group intake quartiles by metric. ....                                                                                                                                                                                                     | 15 |
| <b>Table S9</b>  | Hazard ratios (95% confidence intervals) for survival outcomes according to daily intake of NOVA 1–4 food groups (g/day) in the Guangdong Colorectal Cancer Cohort Study (excluding participants with a family history of cancer in first-degree relatives).....                 | 16 |
| <b>Table S10</b> | Hazard ratios (95% confidence intervals) for survival outcomes according to daily intake of NOVA 1–4 food groups (g/day) in the Guangdong Colorectal Cancer Cohort Study (excluding participants who died within 180 days after cancer diagnosis). ....                          | 17 |
| <b>Table S11</b> | Hazard ratios (95% confidence intervals) for survival outcomes according to daily intake of NOVA 1–4 food groups (g/day) in the Guangdong Colorectal Cancer Cohort Study (excluding participants with cancer stage IV). ....                                                     | 18 |
| <b>Table S12</b> | Hazard ratios (95% confidence intervals) for survival outcomes according to daily intake of NOVA 1–4 food groups (g/day) in the Guangdong Colorectal Cancer Cohort Study (further adjusted for other three NOVA-defined food groups). ....                                       | 19 |
| <b>Table S13</b> | Hazard ratios (95% confidence intervals) for survival outcomes according to daily intake of NOVA 1–4 food groups (g/day) in the Guangdong Colorectal Cancer Cohort Study (further adjusted for a proxy measure of NSAID use).....                                                | 20 |
| <b>Table S14</b> | Reclassification of food items for sensitivity analysis.....                                                                                                                                                                                                                     | 21 |
| <b>Table S15</b> | Hazard ratios (95% confidence intervals) for survival outcomes according to daily intake of NOVA 1–4 food groups (g/day) in the Guangdong Colorectal Cancer Cohort Study (reclassification of food items). ....                                                                  | 22 |
| <b>Table S16</b> | Association of inflammation biomarkers with colorectal cancer prognosis. ....                                                                                                                                                                                                    | 23 |
| <b>Table S17</b> | Associations between consumption of NOVA 1–4 food groups (g/day) and inflammatory biomarkers. ....                                                                                                                                                                               | 24 |
| <b>Table S18</b> | Mediating effects of inflammatory biomarkers on the associations between daily intake                                                                                                                                                                                            |    |

|                                                                                                                                                                                                                                                                                               |    |
|-----------------------------------------------------------------------------------------------------------------------------------------------------------------------------------------------------------------------------------------------------------------------------------------------|----|
| of NOVA 1–4 food groups (g/day) and colorectal cancer prognosis. ....                                                                                                                                                                                                                         | 26 |
| <b>Table S19</b> Mediating effects of inflammatory biomarkers on the associations between daily intake of NOVA 1–4 food groups (g/day) and colorectal cancer prognosis (further adjusted for a proxy measure of NSAID use). ....                                                              | 28 |
| <b>Table S20</b> Mediating effects of inflammatory biomarkers on the associations between daily intake of NOVA 1–4 food groups (g/day) and colorectal cancer prognosis (further adjusted for a Dietary Guideline Adherence Score based on the Chinese Dietary Guidelines <sup>a</sup> ). .... | 30 |

**Table S1** Examples of food products in each food category according to the NOVA classification.

| <b>Food category</b>                             | <b>Food items</b>                                                                                                                                                                                                                                                                                                                                                                                                                                                                                                                                                                                                                                                                                                                                                                                                                                                                                                                                                                                                                                                                                                                                                                                                                                                                                                                                                                                                |
|--------------------------------------------------|------------------------------------------------------------------------------------------------------------------------------------------------------------------------------------------------------------------------------------------------------------------------------------------------------------------------------------------------------------------------------------------------------------------------------------------------------------------------------------------------------------------------------------------------------------------------------------------------------------------------------------------------------------------------------------------------------------------------------------------------------------------------------------------------------------------------------------------------------------------------------------------------------------------------------------------------------------------------------------------------------------------------------------------------------------------------------------------------------------------------------------------------------------------------------------------------------------------------------------------------------------------------------------------------------------------------------------------------------------------------------------------------------------------|
| Unprocessed or minimally processed foods (NOVA1) | <p>Light-green leafy vegetables (e.g., cabbage, baby napa cabbage, and cauliflower)</p> <p>Dark-green leafy vegetables (e.g., Chinese flowering cabbage, mustard greens, broccoli, and spinach)</p> <p>Fruit-vegetables (e.g., winter melon, cucumber, tomato, pepper, carrot, and radish)</p> <p>Root and tuber vegetables (e.g., potato, sweet potato, kudzu, Chinese yam, water chestnut, jicama, taro)</p> <p>Fruits (e.g., oranges, watermelon, apple, peach, strawberry, banana)</p> <p>Edible Fungi (e.g., mushrooms, wood ear fungus, white fungus, enoki mushroom)</p> <p>Sea food (e.g., finfish such as salmon and cod; crustaceans such as shrimp and crab; mollusks such as oysters and squid)</p> <p>Unprocessed red meat (e.g., raw beef, raw lamb)</p> <p>Poultry (e.g., raw chicken, raw duck)</p> <p>Animal organs (e.g., fresh and unprocessed liver, heart, kidney)</p> <p>Nuts (e.g., walnut, cashew, almond, pistachio)</p> <p>Egg (e.g., hen egg, quail egg)</p> <p>Soy (only dry soybeans and fresh edamame)</p> <p>Grains and their prepared forms (e.g., polished rice, cooked rice, porridge made with water)</p> <p>Milk</p>                                                                                                                                                                                                                                                         |
| Processed culinary ingredients (NOVA2)           | Plant oil, Animal fats                                                                                                                                                                                                                                                                                                                                                                                                                                                                                                                                                                                                                                                                                                                                                                                                                                                                                                                                                                                                                                                                                                                                                                                                                                                                                                                                                                                           |
| Processed foods (NOVA3)                          | <p>Processed bread (e.g., white bread, whole-wheat bread, baguettes)</p> <p>Processed fish products (e.g., salted, smoked fish without additives)</p> <p>Alcoholic beverages (e.g., beer, wine)</p> <p>Soybean products (e.g., tofu - in soft, firm, or frozen forms, pressed tofu (dougan))</p>                                                                                                                                                                                                                                                                                                                                                                                                                                                                                                                                                                                                                                                                                                                                                                                                                                                                                                                                                                                                                                                                                                                 |
| Ultra-processed foods (NOVA4)                    | <p>Sugar-sweetened soft drinks (e.g., colas, lemon-lime sodas)</p> <p>Other sweetened beverages (e.g., fruit drinks, sports drinks)</p> <p>Ultra-processed breads (prepacked and branded)</p> <p>Ultra-processed ready-to-eat dishes (e.g., cha siu bao, pumpkin cakes, shumai, youtiao (fried dough stick), spring rolls)</p> <p>Ultra-processed fish products (canned fish products in sauces, brines, or with added flavors, e.g., canned dace with fermented black beans (typically containing flavour enhancers and colourants), canned sea fish in tomato or braised-style sauces with thickeners and stabilisers)</p> <p>Ultra-processed soybean Products (e.g., commercially prepared, flavored, and preserved bean curd products such as xianggan (savory baked tofu) and zhajiji (vegetarian chicken))</p> <p>Preserved vegetables (e.g., suancai (Chinese pickled cabbage), zha cai (Sichuan pickled mustard tuber), mei cai (Chinese salted and fermented dried cabbage/pakchoi), which are traditional Chinese pickled or fermented foods)</p> <p>Pastries and sweet snacks (e.g., cakes, egg tarts, and walnut cookies)</p> <p>Processed meats (e.g., ham, sausages, hot dogs, bacon)</p> <p>Preserved egg (e.g., salted egg, century eggs)</p> <p>Dairy products (e.g., cheese, yogurt)</p> <p>Biscuits (cookies)</p> <p>Frozen desserts (e.g., ice cream)</p> <p>Soy milk</p> <p>Milk powder</p> |

**Table S2** Baseline characteristics of cancer survivors by quartiles of NOVA 2 foods intake.

| Characteristics                                                                                    | Q1 (n=671)                    | Q2 (n=680)                    | Q3 (n=734)                    | Q4 (n=714)                    | P      |
|----------------------------------------------------------------------------------------------------|-------------------------------|-------------------------------|-------------------------------|-------------------------------|--------|
| Age at diagnosis (years), median (P <sub>25</sub> , P <sub>75</sub> ) <sup>a</sup>                 | 57.67 (48.49, 64.22)          | 59.35 (50.12, 66.02)          | 58.58 (50.27, 64.96)          | 58.16 (49.91, 64.88)          | 0.129  |
| Male, (n, %) <sup>a</sup>                                                                          | 382 (56.9)                    | 357 (52.5)                    | 408 (55.6)                    | 456 (63.9)                    | <0.001 |
| Income, Yuan/month, (n, %) <sup>a</sup>                                                            |                               |                               |                               |                               | <0.001 |
| Less than 2000                                                                                     | 77 (11.5)                     | 90 (13.2)                     | 97 (13.2)                     | 115 (16.1)                    |        |
| 2001–5000                                                                                          | 180 (26.8)                    | 207 (30.4)                    | 272 (37.1)                    | 276 (38.7)                    |        |
| 5001–8000                                                                                          | 183 (27.3)                    | 233 (34.3)                    | 222 (30.2)                    | 192 (26.9)                    |        |
| More than 8001                                                                                     | 231 (34.4)                    | 150 (22.1)                    | 143 (19.5)                    | 131 (18.3)                    |        |
| BMI (kg/m <sup>2</sup> ) (n, %) <sup>a</sup>                                                       |                               |                               |                               |                               | <0.001 |
| < 24.0                                                                                             | 427 (63.6)                    | 422 (62.1)                    | 438 (59.7)                    | 379 (53.1)                    |        |
| 24-28                                                                                              | 209 (31.1)                    | 207 (30.4)                    | 245 (33.4)                    | 263 (36.8)                    |        |
| ≥ 28                                                                                               | 35 (5.2)                      | 51 (7.5)                      | 51 (6.9)                      | 72 (10.1)                     |        |
| Physical activity (MET-hours/week), median (P <sub>25</sub> , P <sub>75</sub> ) <sup>a</sup>       | 28.88 (6.75, 52.50)           | 31.50 (13.13, 52.50)          | 26.25 (7.88, 52.50)           | 26.25 (6.75, 52.26)           | <0.001 |
| Smoking status (n, %) <sup>a</sup>                                                                 | 253 (37.7)                    | 245 (36.0)                    | 282 (38.4)                    | 323 (45.2)                    | 0.002  |
| Alcohol consumption (n, %) <sup>a</sup>                                                            | 101 (15.1)                    | 107 (15.7)                    | 125 (17.0)                    | 171 (23.9)                    | <0.001 |
| Energy (kcal/day), median (P <sub>25</sub> , P <sub>75</sub> ) <sup>a, b</sup>                     | 1508.76<br>(1239.88, 1856.58) | 1461.97<br>(1190.56, 1793.47) | 1415.60<br>(1113.81, 1737.09) | 1555.06<br>(1239.60, 1881.79) | <0.001 |
| Energy-adjusted NOVA 1 foods (g/day), median (P <sub>25</sub> , P <sub>75</sub> ), <sup>a, b</sup> | 992.42 (820.76, 1192.04)      | 964.97 (778.48, 1208.14)      | 930.25 (746.98, 1152.96)      | 926.23 (768.56, 1150.62)      | <0.001 |
| Energy-adjusted NOVA 2 foods (g/day), median (P <sub>25</sub> , P <sub>75</sub> ) <sup>a, b</sup>  | 6.67 (0.00, 10.42)            | 18.37 (15.33, 20.83)          | 26.10 (23.75, 28.33)          | 35.59 (32.20, 41.67)          | <0.001 |
| Energy-adjusted NOVA 3 foods (g/day), median (P <sub>25</sub> , P <sub>75</sub> ) <sup>a, b</sup>  | 79.05 (36.14, 135.25)         | 82.19 (41.63, 150.00)         | 78.57 (33.94, 150.00)         | 91.51 (42.68, 161.52)         | 0.012  |
| Energy-adjusted NOVA 4 foods (g/day), median                                                       | 45.76 (23.40, 89.20)          | 43.38 (19.00, 85.00)          | 33.81 (11.92, 70.35)          | 41.76 (19.63, 85.32)          | <0.001 |

| (P <sub>25</sub> , P <sub>75</sub> ) <sup>a, b</sup>                   |            |            |            |            |        |
|------------------------------------------------------------------------|------------|------------|------------|------------|--------|
| Family history of cancer in first-degree relatives (n, %) <sup>a</sup> | 103 (15.4) | 99 (14.6)  | 109 (14.9) | 105 (14.7) | 0.979  |
| Cancer stage (n, %) <sup>a</sup>                                       |            |            |            |            | 0.043  |
| I                                                                      | 119 (17.7) | 98 (14.4)  | 116 (15.8) | 89 (12.5)  |        |
| II                                                                     | 214 (31.9) | 230 (33.8) | 258 (35.1) | 243 (34.0) |        |
| III                                                                    | 206 (30.7) | 224 (32.9) | 255 (34.7) | 245 (34.3) |        |
| IV                                                                     | 123 (18.3) | 121 (17.8) | 96 (13.1)  | 121 (16.9) |        |
| Unknown                                                                | 9 (1.3)    | 7 (1.0)    | 9 (1.2)    | 16 (2.2)   |        |
| Cancer site (n, %) <sup>a</sup>                                        |            |            |            |            | <0.001 |
| Colon                                                                  | 440 (65.6) | 438 (64.4) | 506 (68.9) | 409 (57.3) |        |
| Rectum                                                                 | 231 (34.4) | 242 (35.6) | 228 (31.1) | 305 (42.7) |        |
| Tumor differentiation (n, %) <sup>a</sup>                              |            |            |            |            | 0.764  |
| Well                                                                   | 5 (0.7)    | 6 (0.9)    | 7 (1.0)    | 6 (0.8)    |        |
| Moderate                                                               | 499 (74.4) | 488 (71.8) | 537 (73.2) | 542 (75.9) |        |
| Poor                                                                   | 128 (19.1) | 152 (22.4) | 154 (21.0) | 128 (17.9) |        |
| Unknown                                                                | 39 (5.8)   | 34 (5.0)   | 36 (4.9)   | 38 (5.3)   |        |
| Surgery, n (%) <sup>a</sup>                                            | 647 (96.4) | 649 (95.4) | 707 (96.3) | 672 (94.1) | 0.126  |
| Radiotherapy or chemotherapy (n, %) <sup>a</sup>                       | 461 (68.7) | 457 (67.2) | 458 (62.4) | 461 (64.6) | 0.062  |

Abbreviations: BMI, body mass index. MET, metabolic equivalent task. NOVA 1: unprocessed/minimally processed foods; NOVA 2: processed culinary ingredients; NOVA 3: processed foods; NOVA 4: ultra-processed foods. Q: quartile.

<sup>a</sup> Continuous variables were assessed by Wilcoxon rank-sum tests. Categorical variables were evaluated by  $\chi^2$  tests.

<sup>b</sup> Adjust food and nutrient intake using energy residual method.

**Table S3** Baseline characteristics of cancer survivors by quartiles of NOVA 3 foods intake.

| Characteristics                                                                                    | Q1 (n=699)                    | Q2 (n=698)                    | Q3 (n=702)                    | Q4 (n=700)                    | P      |
|----------------------------------------------------------------------------------------------------|-------------------------------|-------------------------------|-------------------------------|-------------------------------|--------|
| Age at diagnosis (years), median (P <sub>25</sub> , P <sub>75</sub> ) <sup>a</sup>                 | 59.12 (50.53, 64.71)          | 57.55 (48.12, 64.85)          | 58.85 (50.22, 65.57)          | 58.12 (50.02, 65.11)          | 0.157  |
| Male, (n, %) <sup>a</sup>                                                                          | 321 (45.9)                    | 348 (49.9)                    | 405 (57.7)                    | 529 (75.6)                    | <0.001 |
| Income, Yuan/month, (n, %) <sup>a</sup>                                                            |                               |                               |                               |                               | <0.001 |
| Less than 2000                                                                                     | 123 (17.6)                    | 72 (10.3)                     | 86 (12.3)                     | 98 (14.0)                     |        |
| 2001–5000                                                                                          | 259 (37.1)                    | 240 (34.4)                    | 216 (30.8)                    | 220 (31.4)                    |        |
| 5001–8000                                                                                          | 205 (29.3)                    | 199 (28.5)                    | 215 (30.6)                    | 211 (30.1)                    |        |
| More than 8001                                                                                     | 112 (16.0)                    | 187 (26.8)                    | 185 (26.4)                    | 171 (24.4)                    |        |
| BMI (kg/m <sup>2</sup> ) (n, %) <sup>a</sup>                                                       |                               |                               |                               |                               | 0.060  |
| < 24.0                                                                                             | 442 (63.2)                    | 412 (59.0)                    | 425 (60.5)                    | 387 (55.3)                    |        |
| 24-28                                                                                              | 210 (30.0)                    | 239 (34.2)                    | 228 (32.5)                    | 247 (35.3)                    |        |
| ≥ 28                                                                                               | 47 (6.7)                      | 47 (6.7)                      | 49 (7.0)                      | 66 (9.4)                      |        |
| Physical activity (MET-hours/week), median (P <sub>25</sub> , P <sub>75</sub> ) <sup>a</sup>       | 37.13 (10.97, 52.50)          | 26.97 (10.50, 52.50)          | 28.88 (9.63, 52.50)           | 20.75 (5.25, 47.34)           | <0.001 |
| Smoking status (n, %) <sup>a</sup>                                                                 | 232 (33.2)                    | 225 (32.2)                    | 265 (37.7)                    | 381 (54.4)                    | <0.001 |
| Alcohol consumption (n, %) <sup>a</sup>                                                            | 31 (4.4)                      | 57 (8.2)                      | 102 (14.5)                    | 314 (44.9)                    | <0.001 |
| Energy (kcal/day), median (P <sub>25</sub> , P <sub>75</sub> ) <sup>a, b</sup>                     | 1326.50<br>(1061.92, 1630.74) | 1371.48<br>(1132.88, 1673.49) | 1499.77<br>(1256.62, 1811.06) | 1731.21<br>(1420.76, 2060.98) | <0.001 |
| Energy-adjusted NOVA 1 foods (g/day), median (P <sub>25</sub> , P <sub>75</sub> ), <sup>a, b</sup> | 903.52 (736.36, 1106.38)      | 941.47 (766.22, 1150.40)      | 982.35 (803.55, 1197.30)      | 996.04 (809.09, 1225.02)      | <0.001 |
| Energy-adjusted NOVA 2 foods (g/day), median (P <sub>25</sub> , P <sub>75</sub> ) <sup>a, b</sup>  | 23.00 (12.72, 29.10)          | 23.00 (13.33, 29.10)          | 22.50 (13.03, 30.00)          | 24.00 (15.00, 32.20)          | 0.002  |
| Energy-adjusted NOVA 3 foods (g/day), median (P <sub>25</sub> , P <sub>75</sub> ) <sup>a, b</sup>  | 17.24 (7.92, 28.28)           | 62.71 (50.40, 72.13)          | 110.71 (96.14, 128.88)        | 214.54 (169.66, 300.00)       | <0.001 |
| Energy-adjusted NOVA 4 foods (g/day), median                                                       | 29.33 (11.50, 62.64)          | 44.54 (21.55, 84.78)          | 47.40 (23.92, 90.12)          | 42.92 (18.61, 93.65)          | <0.001 |

| (P <sub>25</sub> , P <sub>75</sub> ) <sup>a, b</sup>                   |            |            |            |            |       |
|------------------------------------------------------------------------|------------|------------|------------|------------|-------|
| Family history of cancer in first-degree relatives (n, %) <sup>a</sup> | 92 (13.2)  | 114 (16.3) | 101 (14.4) | 109 (15.6) | 0.363 |
| Cancer stage (n, %) <sup>a</sup>                                       |            |            |            |            | 0.045 |
| I                                                                      | 110 (15.7) | 111 (15.9) | 120 (17.1) | 81 (11.6)  |       |
| II                                                                     | 246 (35.2) | 229 (32.8) | 213 (30.3) | 257 (36.7) |       |
| III                                                                    | 238 (34.0) | 223 (31.9) | 244 (34.8) | 225 (32.1) |       |
| IV                                                                     | 97 (13.9)  | 123 (17.6) | 118 (16.8) | 123 (17.6) |       |
| Unknown                                                                | 8 (1.1)    | 12 (1.7)   | 7 (1.0)    | 14 (2.0)   |       |
| Cancer site (n, %) <sup>a</sup>                                        |            |            |            |            | 0.424 |
| Colon                                                                  | 431 (61.7) | 459 (65.8) | 455 (64.8) | 448 (64.0) |       |
| Rectum                                                                 | 268 (38.3) | 239 (34.2) | 247 (35.2) | 252 (36.0) |       |
| Tumor differentiation (n, %) <sup>a</sup>                              |            |            |            |            | 0.630 |
| Well                                                                   | 5 (0.7)    | 8 (1.1)    | 7 (1.0)    | 4 (0.6)    |       |
| Moderate                                                               | 519 (74.2) | 519 (74.4) | 516 (73.5) | 512 (73.1) |       |
| Poor                                                                   | 137 (19.6) | 142 (20.3) | 133 (18.9) | 150 (21.4) |       |
| Unknown                                                                | 38 (5.4)   | 29 (4.2)   | 46 (6.6)   | 34 (4.9)   |       |
| Surgery, n (%) <sup>a</sup>                                            | 670 (95.9) | 671 (96.1) | 673 (95.9) | 661 (94.4) | 0.399 |
| Radiotherapy or chemotherapy (n, %) <sup>a</sup>                       | 448 (64.1) | 479 (68.6) | 448 (63.8) | 462 (66.0) | 0.206 |

Abbreviations: BMI, body mass index. MET, metabolic equivalent task. NOVA 1: unprocessed/minimally processed foods; NOVA 2: processed culinary ingredients; NOVA 3: processed foods; NOVA 4: ultra-processed foods. Q: quartile.

<sup>a</sup> Continuous variables were assessed by Wilcoxon rank-sum tests. Categorical variables were evaluated by  $\chi^2$  tests.

<sup>b</sup> Adjust food and nutrient intake using energy residual method.

**Table S4** Baseline characteristics of cancer survivors by quartiles of NOVA 4 foods intake.

| Characteristics                                                                                   | Q1 (n=699)                    | Q2 (n=698)                    | Q3 (n=702)                    | Q4 (n=700)                    | P      |
|---------------------------------------------------------------------------------------------------|-------------------------------|-------------------------------|-------------------------------|-------------------------------|--------|
| Age at diagnosis (years), median (P <sub>25</sub> , P <sub>75</sub> ) <sup>a</sup>                | 60.20 (52.79, 66.06)          | 59.97 (52.10, 65.79)          | 57.69 (48.57, 64.35)          | 54.93 (45.71, 63.28)          | <0.001 |
| Male, (n, %) <sup>a</sup>                                                                         | 396 (56.6)                    | 419 (59.9)                    | 377 (53.9)                    | 411 (58.7)                    | 0.106  |
| Income, Yuan/month, (n, %) <sup>a</sup>                                                           |                               |                               |                               |                               | <0.001 |
| Less than 2000                                                                                    | 131 (18.7)                    | 102 (14.6)                    | 89 (12.7)                     | 57 (8.1)                      |        |
| 2001–5000                                                                                         | 303 (43.3)                    | 253 (36.2)                    | 199 (28.4)                    | 180 (25.7)                    |        |
| 5001–8000                                                                                         | 169 (24.1)                    | 187 (26.8)                    | 234 (33.4)                    | 240 (34.3)                    |        |
| More than 8001                                                                                    | 97 (13.9)                     | 157 (22.5)                    | 178 (25.4)                    | 223 (31.9)                    |        |
| BMI (kg/m <sup>2</sup> ) (n, %) <sup>a</sup>                                                      |                               |                               |                               |                               | 0.52   |
| < 24.0                                                                                            | 428 (61.1)                    | 408 (58.4)                    | 423 (60.4)                    | 407 (58.1)                    |        |
| 24-28                                                                                             | 221 (31.6)                    | 246 (35.2)                    | 218 (31.1)                    | 239 (34.1)                    |        |
| ≥ 28                                                                                              | 51 (7.3)                      | 45 (6.4)                      | 59 (8.4)                      | 54 (7.7)                      |        |
| Physical activity (MET-hours/week), median (P <sub>25</sub> , P <sub>75</sub> ) <sup>a</sup>      | 28.88 (8.77, 52.50)           | 28.88 (10.59, 52.50)          | 28.88 (6.75, 52.50)           | 25.88 (6.81, 50.62)           | 0.077  |
| Smoking status (n, %) <sup>a</sup>                                                                | 294 (42.0)                    | 288 (41.2)                    | 270 (38.6)                    | 251 (35.9)                    | 0.078  |
| Alcohol consumption (n, %) <sup>a</sup>                                                           | 112 (16.0)                    | 122 (17.5)                    | 114 (16.3)                    | 156 (22.3)                    | 0.007  |
| Energy (kcal/day), median (P <sub>25</sub> , P <sub>75</sub> ) <sup>a, b</sup>                    | 1329.28<br>(1046.78, 1665.59) | 1429.86<br>(1171.02, 1746.23) | 1478.34<br>(1228.98, 1822.59) | 1661.28<br>(1376.06, 1986.86) | <0.001 |
| Energy-adjusted NOVA 1 foods (g/day), median (P <sub>25</sub> , P <sub>75</sub> ) <sup>a, b</sup> | 854.89<br>(691.07, 1032.52)   | 930.09<br>(751.95, 1134.64)   | 996.69<br>(823.99, 1183.65)   | 1054.93<br>(863.57, 1293.18)  | <0.001 |
| Energy-adjusted NOVA 2 foods (g/day), median (P <sub>25</sub> , P <sub>75</sub> ) <sup>a, b</sup> | 23.75 (15.62, 29.17)          | 23.50 (13.33, 30.00)          | 22.50 (12.67, 29.75)          | 22.50 (12.50, 30.70)          | 0.03   |
| Energy-adjusted NOVA 3 foods (g/day), median (P <sub>25</sub> , P <sub>75</sub> ) <sup>a, b</sup> | 68.73 (21.21, 150.77)         | 83.28 (41.19, 151.49)         | 80.96 (39.17, 137.11)         | 96.43 (56.71, 164.41)         | <0.001 |
| Energy-adjusted NOVA 4 foods (g/day),                                                             | 8.94 (3.39, 13.21)            | 29.04 (23.52, 35.32)          | 58.66 (48.64, 69.36)          | 126.92 (99.75, 176.15)        | <0.001 |

| median (P <sub>25</sub> , P <sub>75</sub> ) <sup>a, b</sup>            |            |            |            |            |        |
|------------------------------------------------------------------------|------------|------------|------------|------------|--------|
| Family history of cancer in first-degree relatives (n, %) <sup>a</sup> | 83 (11.9)  | 100 (14.3) | 103 (14.7) | 130 (18.6) | 0.005  |
| Cancer stage (n, %) <sup>a</sup>                                       |            |            |            |            | 0.008  |
| I                                                                      | 118 (16.9) | 107 (15.3) | 107 (15.3) | 90 (12.9)  |        |
| II                                                                     | 265 (37.9) | 237 (33.9) | 213 (30.4) | 230 (32.9) |        |
| III                                                                    | 211 (30.1) | 250 (35.8) | 234 (33.4) | 235 (33.6) |        |
| IV                                                                     | 99 (14.1)  | 94 (13.4)  | 135 (19.3) | 133 (19.0) |        |
| Unknown                                                                | 7 (1.0)    | 11 (1.6)   | 11 (1.6)   | 12 (1.7)   |        |
| Cancer site (n, %) <sup>a</sup>                                        |            |            |            |            | 0.087  |
| Colon                                                                  | 462 (66.0) | 426 (60.9) | 466 (66.6) | 439 (62.7) |        |
| Rectum                                                                 | 238 (34.0) | 273 (39.1) | 234 (33.4) | 261 (37.3) |        |
| Tumor differentiation (n, %) <sup>a</sup>                              |            |            |            |            | 0.263  |
| Well                                                                   | 7 (1.0)    | 5 (0.7)    | 5 (0.7)    | 7 (1.0)    |        |
| Moderate                                                               | 526 (75.1) | 535 (76.5) | 513 (73.3) | 492 (70.3) |        |
| Poor                                                                   | 137 (19.6) | 127 (18.2) | 146 (20.9) | 152 (21.7) |        |
| Unknown                                                                | 30 (4.3)   | 32 (4.6)   | 36 (5.1)   | 49 (7.0)   |        |
| Surgery, n (%) <sup>a</sup>                                            | 671 (95.9) | 668 (95.6) | 668 (95.4) | 668 (95.4) | 0.977  |
| Radiotherapy or chemotherapy (n, %) <sup>a</sup>                       | 417 (59.6) | 456 (65.2) | 478 (68.3) | 486 (69.4) | <0.001 |

Abbreviations: BMI, body mass index. MET, metabolic equivalent task. NOVA 1: unprocessed/minimally processed foods; NOVA 2: processed culinary ingredients; NOVA 3: processed foods; NOVA 4: ultra-processed foods. Q: quartile.

<sup>a</sup>Continuous variables were assessed by Wilcoxon rank-sum tests. Categorical variables were evaluated by  $\chi^2$  tests.

<sup>b</sup> Adjust food and nutrient intake using energy residual method.

**Table S5** Percentile-based isothermal substitution analyses (10-percentile change <sup>a</sup>).

| Outcome                                 | Substitution Scenario        | HRs (95% CI s) b, c, d | P     |
|-----------------------------------------|------------------------------|------------------------|-------|
| Overall survival                        | Replacing NOVA 4 with NOVA 1 | 0.965 (0.931, 0.999)   | 0.046 |
|                                         | Replacing NOVA 3 with NOVA 1 | 0.968 (0.935, 1.003)   | 0.070 |
| Colorectal cancer-specific survival     | Replacing NOVA 4 with NOVA 1 | 0.957 (0.922, 0.993)   | 0.020 |
|                                         | Replacing NOVA 3 with NOVA 1 | 0.963 (0.929, 0.999)   | 0.046 |
| Recurrence- or metastasis-free survival | Replacing NOVA 4 with NOVA 1 | 0.983 (0.946, 1.022)   | 0.383 |
|                                         | Replacing NOVA 3 with NOVA 1 | 0.984 (0.947, 1.022)   | 0.405 |

Abbreviations: NOVA 1: unprocessed/minimally processed foods; NOVA 3: processed foods; NOVA 4: ultra-processed foods.

<sup>a</sup> Intake percentiles by NOVA category: Unprocessed/minimally processed foods (NOVA1) - 10th: 608.5, 25th: 776.9, 50th: 954.4, 75th: 1176.2, 90th: 1429.7; Processed foods (NOVA3) - 10th: 13.5, 25th: 38.9, 50th: 82.5, 75th: 151.2, 90th: 235.0; Ultra-processed foods (NOVA4) - 10th: 7.1, 25th: 18.1, 50th: 41.3, 75th: 82.0, 90th: 145.4.

<sup>b</sup> Model adjusted for age at diagnosis, sex, BMI, smoking status, drinking status, MET, total energy intake, TNM stage, cancer site, tumor differentiation, surgery, radiotherapy or chemotherapy, and family history of cancer in first-degree relatives.

<sup>c</sup> Models estimate the effect of substituting 25 grams of one NOVA category with 25 grams of another.

<sup>d</sup> Three decimal places are used for HRs to preserve statistical precision of borderline significant findings.

**Table S6** Hazard ratios (95% confidence intervals) for survival outcomes according to daily intake of NOVA 1–4 food groups (g/day) in the Guangdong Colorectal Cancer Cohort Study (further adjusted for a Dietary Guideline Adherence Score based on the Chinese Dietary Guidelines).

|                                                             | Q1   | Q2                | Q3                | Q4                | P-Trend <sup>b</sup> |
|-------------------------------------------------------------|------|-------------------|-------------------|-------------------|----------------------|
| <b>Overall survival <sup>a</sup></b>                        |      |                   |                   |                   |                      |
| NOVA 1                                                      | Ref. | 0.86 (0.69, 1.07) | 0.92 (0.73, 1.17) | 0.72 (0.54, 0.95) | 0.051                |
| NOVA 2                                                      | Ref. | 0.94 (0.77, 1.16) | 0.83 (0.67, 1.04) | 0.93 (0.76, 1.14) | 0.588                |
| NOVA 3                                                      | Ref. | 1.09 (0.88, 1.36) | 1.03 (0.82, 1.28) | 0.92 (0.72, 1.16) | 0.077                |
| NOVA 4                                                      | Ref. | 0.98 (0.78, 1.21) | 1.10 (0.88, 1.37) | 1.05 (0.83, 1.32) | 0.401                |
| <b>Colorectal cancer-specific survival <sup>a</sup></b>     |      |                   |                   |                   |                      |
| NOVA 1                                                      | Ref. | 0.85 (0.68, 1.07) | 0.87 (0.68, 1.12) | 0.71 (0.52, 0.95) | 0.036                |
| NOVA 2                                                      | Ref. | 0.94 (0.76, 1.17) | 0.86 (0.68, 1.08) | 0.90 (0.72, 1.12) | 0.536                |
| NOVA 3                                                      | Ref. | 1.05 (0.83, 1.31) | 0.96 (0.76, 1.21) | 0.83 (0.64, 1.06) | 0.012                |
| NOVA 4                                                      | Ref. | 1.06 (0.84, 1.33) | 1.15 (0.92, 1.45) | 1.08 (0.85, 1.38) | 0.622                |
| <b>Recurrence- or metastasis-free survival <sup>a</sup></b> |      |                   |                   |                   |                      |
| NOVA 1                                                      | Ref. | 0.99 (0.77, 1.27) | 1.10 (0.84, 1.44) | 0.92 (0.67, 1.26) | 0.941                |
| NOVA 2                                                      | Ref. | 1.24 (0.98, 1.57) | 0.99 (0.77, 1.27) | 1.00 (0.79, 1.28) | 0.962                |
| NOVA 3                                                      | Ref. | 1.10 (0.86, 1.40) | 0.98 (0.77, 1.26) | 0.98 (0.75, 1.28) | 0.287                |
| NOVA 4                                                      | Ref. | 1.17 (0.91, 1.51) | 1.08 (0.84, 1.40) | 1.33 (1.03, 1.73) | 0.138                |

Abbreviations: NOVA 1: unprocessed/minimally processed foods; NOVA 2: processed culinary ingredients; NOVA 3: processed foods; NOVA 4: ultra-processed foods. Q: quartile.

<sup>a</sup> Model adjusted for age at diagnosis, sex, BMI, smoking status, alcohol consumption, physical activity, total energy intake, cancer stage, cancer site, tumor differentiation, surgery, radiotherapy or chemotherapy, history of cancer in first-degree relatives and a Dietary Guideline Adherence Score based on the Chinese Dietary Guidelines.

<sup>b</sup> Test for linear trend was based on the median values for each quartile.

**Table S7** Hazard ratios (95% confidence intervals) for survival outcomes according to daily intake of NOVA 1–4 food groups (% energy) in the Guangdong Colorectal Cancer Cohort study.

|                                            | Q1      | Q2                | Q3                | Q4                | <i>P-Trend<sup>a</sup></i> |
|--------------------------------------------|---------|-------------------|-------------------|-------------------|----------------------------|
| <b>Overall survival</b>                    |         |                   |                   |                   |                            |
| NOVA 1                                     |         |                   |                   |                   |                            |
| Event/Number                               | 170/700 | 184/699           | 173/700           | 188/700           |                            |
| Crude model                                | Ref.    | 1.09 (0.88, 1.34) | 0.99 (0.80, 1.22) | 1.07 (0.87, 1.32) | 0.722                      |
| Adjusted model 1 <sup>b</sup>              | Ref.    | 1.11 (0.90, 1.37) | 1.01 (0.82, 1.25) | 1.02 (0.83, 1.26) | 0.932                      |
| Adjusted model 2 <sup>c</sup>              | Ref.    | 1.06 (0.86, 1.31) | 1.03 (0.83, 1.28) | 1.10 (0.89, 1.36) | 0.453                      |
| NOVA 2                                     |         |                   |                   |                   |                            |
| Event/Number                               | 199/700 | 174/699           | 162/700           | 180/700           |                            |
| Crude model                                | Ref.    | 0.96 (0.79, 1.18) | 0.89 (0.73, 1.10) | 1.02 (0.83, 1.25) | 0.942                      |
| Adjusted model 1 <sup>b</sup>              | Ref.    | 0.97 (0.79, 1.19) | 0.89 (0.72, 1.09) | 1.00 (0.82, 1.23) | 0.816                      |
| Adjusted model 2 <sup>c</sup>              | Ref.    | 1.03 (0.84, 1.27) | 0.92 (0.75, 1.14) | 0.95 (0.77, 1.17) | 0.410                      |
| NOVA 3                                     |         |                   |                   |                   |                            |
| Event/Number                               | 180/700 | 181/699           | 186/700           | 168/700           |                            |
| Crude model                                | Ref.    | 1.01 (0.82, 1.24) | 1.06 (0.86, 1.30) | 0.94 (0.76, 1.16) | 0.690                      |
| Adjusted model 1 <sup>b</sup>              | Ref.    | 1.07 (0.87, 1.32) | 1.13 (0.92, 1.39) | 0.98 (0.79, 1.21) | 0.969                      |
| Adjusted model 2 <sup>c</sup>              | Ref.    | 0.99 (0.80, 1.23) | 1.03 (0.84, 1.28) | 0.88 (0.71, 1.09) | 0.328                      |
| NOVA 4                                     |         |                   |                   |                   |                            |
| Event/Number                               | 164/700 | 185/699           | 198/700           | 168/700           |                            |
| Crude model                                | Ref.    | 1.08 (0.88, 1.33) | 1.22 (0.99, 1.50) | 0.98 (0.79, 1.21) | 0.880                      |
| Adjusted model 1 <sup>b</sup>              | Ref.    | 1.09 (0.88, 1.35) | 1.27 (1.03, 1.56) | 1.05 (0.84, 1.30) | 0.396                      |
| Adjusted model 2 <sup>c</sup>              | Ref.    | 1.01 (0.82, 1.25) | 1.16 (0.94, 1.43) | 1.00 (0.80, 1.24) | 0.730                      |
| <b>Colorectal cancer-specific survival</b> |         |                   |                   |                   |                            |
| NOVA 1                                     |         |                   |                   |                   |                            |
| Event/Number                               | 142/700 | 169/699           | 164/700           | 172/700           |                            |
| Crude model                                | Ref.    | 1.19 (0.96, 1.49) | 1.13 (0.90, 1.41) | 1.18 (0.94, 1.47) | 0.236                      |
| Adjusted model 1 <sup>b</sup>              | Ref.    | 1.22 (0.97, 1.52) | 1.15 (0.92, 1.44) | 1.13 (0.90, 1.41) | 0.429                      |
| Adjusted model 2 <sup>c</sup>              | Ref.    | 1.16 (0.93, 1.46) | 1.17 (0.93, 1.47) | 1.18 (0.94, 1.48) | 0.087                      |
| NOVA 2                                     |         |                   |                   |                   |                            |
| Event/Number                               | 178/700 | 153/699           | 146/700           | 170/700           |                            |
| Crude model                                | Ref.    | 0.93 (0.75, 1.15) | 0.88 (0.71, 1.09) | 1.05 (0.85, 1.30) | 0.798                      |
| Adjusted model 1 <sup>b</sup>              | Ref.    | 0.94 (0.75, 1.16) | 0.88 (0.70, 1.09) | 1.04 (0.84, 1.29) | 0.875                      |
| Adjusted model 2 <sup>c</sup>              | Ref.    | 1.01 (0.81, 1.27) | 0.92 (0.74, 1.15) | 0.99 (0.80, 1.24) | 0.720                      |
| NOVA 3                                     |         |                   |                   |                   |                            |
| Event/Number                               | 168/700 | 149/699           | 166/700           | 144/700           |                            |
| Crude model                                | Ref.    | 1.01 (0.82, 1.25) | 1.01 (0.81, 1.25) | 0.86 (0.69, 1.08) | 0.229                      |
| Adjusted model 1 <sup>b</sup>              | Ref.    | 1.06 (0.86, 1.32) | 1.07 (0.86, 1.32) | 0.89 (0.71, 1.12) | 0.373                      |
| Adjusted model 2 <sup>c</sup>              | Ref.    | 0.97 (0.78, 1.21) | 0.96 (0.77, 1.20) | 0.80 (0.64, 1.00) | 0.061                      |
| NOVA 4                                     |         |                   |                   |                   |                            |
| Event/Number                               | 146/700 | 164/699           | 182/700           | 155/700           |                            |
| Crude model                                | Ref.    | 1.09 (0.87, 1.36) | 1.26 (1.02, 1.57) | 1.02 (0.82, 1.28) | 0.550                      |
| Adjusted model 1 <sup>b</sup>              | Ref.    | 1.09 (0.87, 1.37) | 1.30 (1.05, 1.63) | 1.08 (0.86, 1.36) | 0.264                      |

|                                                |      |                   |                   |                   |         |
|------------------------------------------------|------|-------------------|-------------------|-------------------|---------|
| Adjusted model 2 <sup>c</sup>                  | Ref. | 1.02 (0.81, 1.27) | 1.23 (0.98, 1.55) | 1.02 (0.81, 1.29) | 0.562   |
| <b>Recurrence- or metastasis-free survival</b> |      |                   |                   |                   |         |
| <b>NOVA 1</b>                                  |      |                   |                   |                   |         |
| Event/Number                                   |      | 134/700           | 149/699           | 137/700           | 137/700 |
| Crude model                                    | Ref. | 1.14 (0.90, 1.44) | 1.03 (0.81, 1.30) | 1.02 (0.80, 1.29) | 0.883   |
| Adjusted model 1 <sup>b</sup>                  | Ref. | 1.10 (0.87, 1.40) | 1.00 (0.78, 1.26) | 1.00 (0.78, 1.27) | 0.747   |
| Adjusted model 2 <sup>c</sup>                  | Ref. | 1.14 (0.90, 1.44) | 0.97 (0.76, 1.23) | 1.09 (0.86, 1.39) | 0.825   |
| <b>NOVA 2</b>                                  |      |                   |                   |                   |         |
| Event/Number                                   |      | 159/700           | 149/699           | 137/700           | 137/700 |
| Crude model                                    | Ref. | 0.85 (0.67, 1.07) | 0.82 (0.65, 1.04) | 0.93 (0.74, 1.17) | 0.472   |
| Adjusted model 1 <sup>b</sup>                  | Ref. | 0.86 (0.68, 1.09) | 0.84 (0.67, 1.07) | 0.97 (0.77, 1.22) | 0.725   |
| Adjusted model 2 <sup>c</sup>                  | Ref. | 0.93 (0.74, 1.18) | 0.89 (0.70, 1.13) | 1.04 (0.82, 1.31) | 0.922   |
| <b>NOVA 3</b>                                  |      |                   |                   |                   |         |
| Event/Number                                   |      | 133/700           | 140/699           | 145/700           | 139/700 |
| Crude model                                    | Ref. | 1.05 (0.83, 1.33) | 1.10 (0.87, 1.40) | 1.04 (0.82, 1.32) | 0.663   |
| Adjusted model 1 <sup>b</sup>                  | Ref. | 1.01 (0.80, 1.29) | 1.09 (0.86, 1.39) | 1.04 (0.82, 1.32) | 0.614   |
| Adjusted model 2 <sup>c</sup>                  | Ref. | 0.93 (0.73, 1.18) | 0.99 (0.78, 1.26) | 0.98 (0.77, 1.24) | 0.983   |
| <b>NOVA 4</b>                                  |      |                   |                   |                   |         |
| Event/Number                                   |      | 134/700           | 141/699           | 139/700           | 143/700 |
| Crude model                                    | Ref. | 1.03 (0.81, 1.31) | 1.05 (0.83, 1.34) | 1.06 (0.84, 1.34) | 0.596   |
| Adjusted model 1 <sup>b</sup>                  | Ref. | 1.00 (0.79, 1.27) | 1.02 (0.80, 1.29) | 1.02 (0.80, 1.30) | 0.838   |
| Adjusted model 2 <sup>c</sup>                  | Ref. | 0.98 (0.77, 1.24) | 0.93 (0.73, 1.19) | 0.95 (0.75, 1.21) | 0.599   |

Abbreviations: NOVA 1: unprocessed or minimally processed foods; NOVA 2: processed culinary ingredients; NOVA 3: processed foods; NOVA 4: ultra-processed foods. Q: quartile.

<sup>a</sup> Test for linear trend was based on the median values for each quartile.

<sup>b</sup> Model 1 adjusted for age at diagnosis, sex, BMI, smoking status, alcohol consumption, physical activity.

<sup>c</sup> Model 2 additionally adjusted for cancer stage, cancer site, tumor differentiation, surgery, radiotherapy or chemotherapy, and family history of cancer in first-degree relatives.

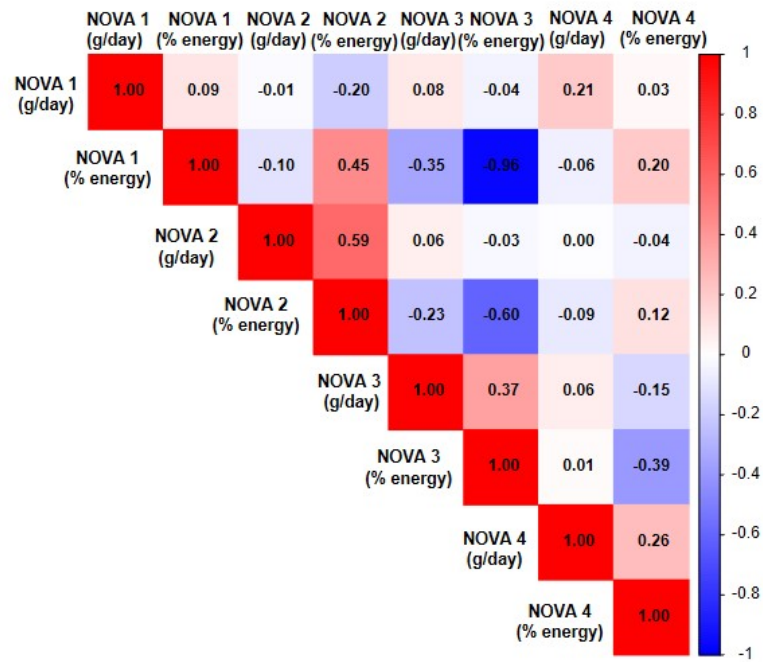

**Figure S1** Correlation between grams per day and % energy across NOVA 1-4 food groups.

Abbreviations: NOVA 1: unprocessed or minimally processed foods; NOVA 2: processed culinary ingredients; NOVA 3: processed foods; NOVA 4: ultra-processed foods.

**Table S8** Cross-classification of NOVA 1-4 food group intake quartiles by metric.

|            | % energy Q1 | % energy Q2 | % energy Q3 | % energy Q4 |
|------------|-------------|-------------|-------------|-------------|
| NOVA 1     |             |             |             |             |
| Q1 (g/day) | 242         | 180         | 164         | 14          |
| Q2 (g/day) | 158         | 170         | 178         | 193         |
| Q3 (g/day) | 131         | 156         | 206         | 207         |
| Q1 (g/day) | 169         | 193         | 152         | 186         |
| NOVA 2     |             |             |             |             |
| Q1 (g/day) | 498         | 145         | 44          | 13          |
| Q2 (g/day) | 126         | 243         | 201         | 129         |
| Q3 (g/day) | 41          | 202         | 243         | 214         |
| Q1 (g/day) | 6           | 90          | 246         | 358         |
| NOVA 3     |             |             |             |             |
| Q1 (g/day) | 503         | 96          | 37          | 64          |
| Q2 (g/day) | 185         | 318         | 112         | 85          |
| Q3 (g/day) | 11          | 258         | 303         | 128         |
| Q1 (g/day) | 0           | 26          | 250         | 424         |
| NOVA 4     |             |             |             |             |
| Q1 (g/day) | 429         | 191         | 61          | 19          |
| Q2 (g/day) | 117         | 264         | 210         | 108         |
| Q3 (g/day) | 52          | 156         | 267         | 225         |
| Q1 (g/day) | 102         | 88          | 162         | 348         |

Abbreviations: NOVA 1: unprocessed or minimally processed foods; NOVA 2: processed culinary ingredients; NOVA 3: processed foods; NOVA 4: ultra-processed foods. Q: quartile.

**Table S9** Hazard ratios (95% confidence intervals) for survival outcomes according to daily intake of NOVA 1–4 food groups (g/day) in the Guangdong Colorectal Cancer Cohort Study (excluding participants with a family history of cancer in first-degree relatives).

|                                                             | Q1   | Q2                | Q3                | Q4                | <i>P</i> -Trend <sup>b</sup> |
|-------------------------------------------------------------|------|-------------------|-------------------|-------------------|------------------------------|
| <b>Overall survival <sup>a</sup></b>                        |      |                   |                   |                   |                              |
| NOVA 1                                                      | Ref. | 0.86 (0.68, 1.08) | 0.90 (0.70, 1.15) | 0.69 (0.52, 0.93) | 0.034                        |
| NOVA 2                                                      | Ref. | 0.95 (0.76, 1.18) | 0.82 (0.64, 1.04) | 0.85 (0.68, 1.06) | 0.084                        |
| NOVA 3                                                      | Ref. | 1.19 (0.94, 1.51) | 1.09 (0.85, 1.38) | 0.94 (0.72, 1.21) | 0.498                        |
| NOVA 4                                                      | Ref. | 0.99 (0.79, 1.26) | 1.19 (0.94, 1.50) | 1.08 (0.84, 1.38) | 0.317                        |
| <b>Colorectal cancer-specific survival <sup>a</sup></b>     |      |                   |                   |                   |                              |
| NOVA 1                                                      | Ref. | 0.85 (0.67, 1.09) | 0.87 (0.67, 1.13) | 0.70 (0.51, 0.95) | 0.041                        |
| NOVA 2                                                      | Ref. | 0.94 (0.74, 1.18) | 0.83 (0.65, 1.07) | 0.80 (0.63, 1.02) | 0.043                        |
| NOVA 3                                                      | Ref. | 1.12 (0.88, 1.42) | 0.99 (0.77, 1.27) | 0.82 (0.63, 1.08) | 0.114                        |
| NOVA 4                                                      | Ref. | 1.09 (0.85, 1.40) | 1.21 (0.94, 1.56) | 1.08 (0.83, 1.41) | 0.417                        |
| <b>Recurrence- or metastasis-free survival <sup>a</sup></b> |      |                   |                   |                   |                              |
| NOVA 1                                                      | Ref. | 0.95 (0.72, 1.25) | 1.02 (0.77, 1.35) | 0.86 (0.62, 1.20) | 0.503                        |
| NOVA 2                                                      | Ref. | 1.18 (0.92, 1.52) | 1.00 (0.76, 1.30) | 0.99 (0.76, 1.28) | 0.623                        |
| NOVA 3                                                      | Ref. | 1.05 (0.81, 1.37) | 0.96 (0.73, 1.26) | 0.97 (0.72, 1.29) | 0.674                        |
| NOVA 4                                                      | Ref. | 1.24 (0.94, 1.62) | 1.08 (0.82, 1.42) | 1.28 (0.96, 1.69) | 0.206                        |

Abbreviations: NOVA 1: unprocessed/minimally processed foods; NOVA 2: processed culinary ingredients; NOVA 3: processed foods; NOVA 4: ultra-processed foods. Q: quartile.

<sup>a</sup> Model adjusted for age at diagnosis, sex, BMI, smoking status, alcohol consumption, physical activity, total energy intake, cancer stage, cancer site, tumor differentiation, surgery, radiotherapy or chemotherapy.

<sup>b</sup> Test for linear trend was based on the median values for each quartile.

**Table S10** Hazard ratios (95% confidence intervals) for survival outcomes according to daily intake of NOVA 1–4 food groups (g/day) in the Guangdong Colorectal Cancer Cohort Study (excluding participants who died within 180 days after cancer diagnosis).

|                                                             | Q1   | Q2                | Q3                | Q4                | <i>P</i> -Trend <sup>b</sup> |
|-------------------------------------------------------------|------|-------------------|-------------------|-------------------|------------------------------|
| <b>Overall survival <sup>a</sup></b>                        |      |                   |                   |                   |                              |
| NOVA 1                                                      | Ref. | 0.86 (0.68, 1.09) | 0.89 (0.70, 1.15) | 0.69 (0.51, 0.94) | 0.035                        |
| NOVA 2                                                      | Ref. | 0.97 (0.77, 1.21) | 0.87 (0.68, 1.12) | 1.01 (0.81, 1.26) | 0.934                        |
| NOVA 3                                                      | Ref. | 1.12 (0.89, 1.42) | 1.00 (0.78, 1.27) | 0.89 (0.69, 1.15) | 0.265                        |
| NOVA 4                                                      | Ref. | 0.99 (0.78, 1.25) | 1.11 (0.87, 1.41) | 1.18 (0.92, 1.51) | 0.128                        |
| <b>Colorectal cancer-specific survival <sup>a</sup></b>     |      |                   |                   |                   |                              |
| NOVA 1                                                      | Ref. | 0.85 (0.67, 1.09) | 0.83 (0.64, 1.09) | 0.68 (0.50, 0.94) | 0.025                        |
| NOVA 2                                                      | Ref. | 0.94 (0.74, 1.20) | 0.91 (0.70, 1.18) | 0.97 (0.77, 1.23) | 0.802                        |
| NOVA 3                                                      | Ref. | 1.05 (0.82, 1.35) | 0.91 (0.71, 1.18) | 0.77 (0.59, 1.01) | 0.037                        |
| NOVA 4                                                      | Ref. | 1.09 (0.85, 1.41) | 1.17 (0.91, 1.52) | 1.23 (0.95, 1.61) | 0.103                        |
| <b>Recurrence- or metastasis-free survival <sup>a</sup></b> |      |                   |                   |                   |                              |
| NOVA 1                                                      | Ref. | 0.91 (0.69, 1.19) | 0.98 (0.74, 1.29) | 0.81 (0.59, 1.13) | 0.326                        |
| NOVA 2                                                      | Ref. | 1.32 (1.03, 1.70) | 1.11 (0.84, 1.45) | 1.11 (0.86, 1.45) | 0.766                        |
| NOVA 3                                                      | Ref. | 1.13 (0.87, 1.47) | 0.94 (0.71, 1.23) | 0.95 (0.71, 1.27) | 0.461                        |
| NOVA 4                                                      | Ref. | 1.10 (0.84, 1.43) | 0.99 (0.75, 1.31) | 1.23 (0.93, 1.62) | 0.230                        |

Abbreviations: NOVA 1: unprocessed/minimally processed foods; NOVA 2: processed culinary ingredients; NOVA 3: processed foods; NOVA 4: ultra-processed foods. Q: quartile.

<sup>a</sup> Model adjusted for age at diagnosis, sex, BMI, smoking status, alcohol consumption, physical activity, total energy intake, cancer stage, cancer site, tumor differentiation, surgery, radiotherapy or chemotherapy, and family history of cancer in first-degree relatives.

<sup>b</sup> Test for linear trend was based on the median values for each quartile.

**Table S11** Hazard ratios (95% confidence intervals) for survival outcomes according to daily intake of NOVA 1–4 food groups (g/day) in the Guangdong Colorectal Cancer Cohort Study (excluding participants with cancer stage IV).

|                                                             | Q1   | Q2                | Q3                | Q4                | <i>P</i> -Trend <sup>b</sup> |
|-------------------------------------------------------------|------|-------------------|-------------------|-------------------|------------------------------|
| <b>Overall survival <sup>a</sup></b>                        |      |                   |                   |                   |                              |
| NOVA 1                                                      | Ref. | 0.89 (0.66, 1.21) | 0.90 (0.65, 1.25) | 0.67 (0.46, 0.99) | 0.069                        |
| NOVA 2                                                      | Ref. | 0.88 (0.65, 1.18) | 0.81 (0.58, 1.12) | 1.03 (0.77, 1.38) | 0.894                        |
| NOVA 3                                                      | Ref. | 1.11 (0.82, 1.50) | 0.92 (0.67, 1.25) | 0.87 (0.62, 1.21) | 0.271                        |
| NOVA 4                                                      | Ref. | 1.10 (0.82, 1.48) | 0.96 (0.70, 1.31) | 0.95 (0.68, 1.33) | 0.599                        |
| <b>Colorectal cancer-specific survival <sup>a</sup></b>     |      |                   |                   |                   |                              |
| NOVA 1                                                      | Ref. | 0.89 (0.64, 1.23) | 0.83 (0.58, 1.18) | 0.66 (0.44, 1.01) | 0.059                        |
| NOVA 2                                                      | Ref. | 0.83 (0.60, 1.15) | 0.83 (0.59, 1.17) | 0.93 (0.67, 1.28) | 0.683                        |
| NOVA 3                                                      | Ref. | 1.03 (0.74, 1.43) | 0.86 (0.62, 1.20) | 0.75 (0.52, 1.08) | 0.085                        |
| NOVA 4                                                      | Ref. | 1.27 (0.92, 1.76) | 0.98 (0.69, 1.39) | 0.99 (0.69, 1.42) | 0.579                        |
| <b>Recurrence- or metastasis-free survival <sup>a</sup></b> |      |                   |                   |                   |                              |
| NOVA 1                                                      | Ref. | 0.87 (0.64, 1.18) | 0.87 (0.64, 1.19) | 0.82 (0.58, 1.17) | 0.314                        |
| NOVA 2                                                      | Ref. | 1.28 (0.96, 1.71) | 1.20 (0.88, 1.63) | 1.13 (0.83, 1.53) | 0.594                        |
| NOVA 3                                                      | Ref. | 0.91 (0.68, 1.22) | 0.86 (0.64, 1.15) | 0.87 (0.64, 1.20) | 0.349                        |
| NOVA 4                                                      | Ref. | 1.19 (0.88, 1.61) | 0.97 (0.71, 1.33) | 1.09 (0.79, 1.50) | 0.941                        |

Abbreviations: NOVA 1: unprocessed/minimally processed foods; NOVA 2: processed culinary ingredients; NOVA 3: processed foods; NOVA 4: ultra-processed foods. Q: quartile.

Model adjusted for age at diagnosis, sex, BMI, smoking status, alcohol consumption, physical activity, total energy intake, cancer stage, cancer site, tumor differentiation, surgery, radiotherapy or chemotherapy, and family history of cancer in first-degree relatives.

<sup>b</sup>Test for linear trend was based on the median values for each quartile.

**Table S12** Hazard ratios (95% confidence intervals) for survival outcomes according to daily intake of NOVA 1–4 food groups (g/day) in the Guangdong Colorectal Cancer Cohort Study (further adjusted for other three NOVA-defined food groups).

|                                                             | Q1   | Q2                | Q3                | Q4                | <i>P</i> -Trend <sup>b</sup> |
|-------------------------------------------------------------|------|-------------------|-------------------|-------------------|------------------------------|
| <b>Overall survival <sup>a</sup></b>                        |      |                   |                   |                   |                              |
| NOVA 1                                                      | Ref. | 0.85 (0.68, 1.05) | 0.90 (0.71, 1.13) | 0.70 (0.53, 0.93) | 0.035                        |
| NOVA 2                                                      | Ref. | 0.93 (0.75, 1.14) | 0.83 (0.66, 1.04) | 0.91 (0.74, 1.12) | 0.271                        |
| NOVA 3                                                      | Ref. | 1.07 (0.86, 1.34) | 1.01 (0.81, 1.26) | 0.87 (0.69, 1.11) | 0.236                        |
| NOVA 4                                                      | Ref. | 0.98 (0.79, 1.22) | 1.10 (0.88, 1.37) | 1.05 (0.83, 1.32) | 0.489                        |
| <b>Colorectal cancer-specific survival <sup>a</sup></b>     |      |                   |                   |                   |                              |
| NOVA 1                                                      | Ref. | 0.84 (0.67, 1.05) | 0.83 (0.65, 1.06) | 0.68 (0.50, 0.91) | 0.016                        |
| NOVA 2                                                      | Ref. | 0.92 (0.74, 1.15) | 0.85 (0.67, 1.08) | 0.87 (0.70, 1.08) | 0.174                        |
| NOVA 3                                                      | Ref. | 1.02 (0.81, 1.28) | 0.94 (0.75, 1.19) | 0.78 (0.61, 1.00) | 0.045                        |
| NOVA 4                                                      | Ref. | 1.08 (0.86, 1.37) | 1.16 (0.92, 1.47) | 1.09 (0.85, 1.40) | 0.407                        |
| <b>Recurrence- or metastasis-free survival <sup>a</sup></b> |      |                   |                   |                   |                              |
| NOVA 1                                                      | Ref. | 0.94 (0.73, 1.21) | 1.01 (0.78, 1.31) | 0.80 (0.59, 1.09) | 0.249                        |
| NOVA 2                                                      | Ref. | 1.25 (0.99, 1.58) | 1.02 (0.79, 1.30) | 1.02 (0.80, 1.30) | 0.726                        |
| NOVA 3                                                      | Ref. | 1.05 (0.82, 1.33) | 0.94 (0.73, 1.20) | 0.94 (0.72, 1.22) | 0.469                        |
| NOVA 4                                                      | Ref. | 1.12 (0.87, 1.45) | 0.99 (0.77, 1.29) | 1.22 (0.94, 1.58) | 0.256                        |

Abbreviations: NOVA 1: unprocessed/minimally processed foods; NOVA 2: processed culinary ingredients; NOVA 3: processed foods; NOVA 4: ultra-processed foods. Q: quartile.

<sup>a</sup> Model adjusted for age at diagnosis, sex, BMI, smoking status, alcohol consumption, physical activity, total energy intake, cancer stage, cancer site, tumor differentiation, surgery, radiotherapy or chemotherapy, and family history of cancer in first-degree relatives and other three NOVA-defined food groups.

<sup>b</sup> Test for linear trend was based on the median values for each quartile.

**Table S13** Hazard ratios (95% confidence intervals) for survival outcomes according to daily intake of NOVA 1–4 food groups (g/day) in the Guangdong Colorectal Cancer Cohort Study (further adjusted for a proxy measure of NSAID use).

|                                                             | Q1   | Q2                | Q3                | Q4                | <i>P</i> -Trend <sup>b</sup> |
|-------------------------------------------------------------|------|-------------------|-------------------|-------------------|------------------------------|
| <b>Overall survival</b> <sup>a</sup>                        |      |                   |                   |                   |                              |
| NOVA 1                                                      | Ref. | 0.87 (0.70, 1.07) | 0.93 (0.74, 1.17) | 0.73 (0.56, 0.97) | 0.065                        |
| NOVA 2                                                      | Ref. | 0.94 (0.77, 1.16) | 0.84 (0.67, 1.05) | 0.92 (0.75, 1.12) | 0.284                        |
| NOVA 3                                                      | Ref. | 1.11 (0.89, 1.38) | 1.06 (0.85, 1.32) | 0.93 (0.73, 1.17) | 0.498                        |
| NOVA 4                                                      | Ref. | 0.98 (0.79, 1.22) | 1.13 (0.91, 1.40) | 1.08 (0.86, 1.36) | 0.321                        |
| <b>Colorectal cancer-specific survival</b> <sup>a</sup>     |      |                   |                   |                   |                              |
| NOVA 1                                                      | Ref. | 0.86 (0.69, 1.08) | 0.88 (0.69, 1.12) | 0.72 (0.54, 0.97) | 0.050                        |
| NOVA 2                                                      | Ref. | 0.94 (0.76, 1.17) | 0.86 (0.68, 1.09) | 0.88 (0.71, 1.10) | 0.209                        |
| NOVA 3                                                      | Ref. | 1.06 (0.85, 1.33) | 0.99 (0.78, 1.25) | 0.84 (0.65, 1.07) | 0.142                        |
| NOVA 4                                                      | Ref. | 1.06 (0.84, 1.34) | 1.18 (0.94, 1.49) | 1.11 (0.87, 1.42) | 0.285                        |
| <b>Recurrence- or metastasis-free survival</b> <sup>a</sup> |      |                   |                   |                   |                              |
| NOVA 1                                                      | Ref. | 0.94 (0.73, 1.21) | 1.03 (0.79, 1.33) | 0.82 (0.61, 1.11) | 0.329                        |
| NOVA 2                                                      | Ref. | 1.25 (0.99, 1.58) | 1.00 (0.78, 1.29) | 1.03 (0.81, 1.31) | 0.757                        |
| NOVA 3                                                      | Ref. | 1.07 (0.84, 1.36) | 0.96 (0.75, 1.23) | 0.97 (0.75, 1.27) | 0.667                        |
| NOVA 4                                                      | Ref. | 1.13 (0.88, 1.45) | 1.01 (0.78, 1.31) | 1.23 (0.95, 1.59) | 0.215                        |

Abbreviations: NOVA 1: unprocessed/minimally processed foods; NOVA 2: processed culinary ingredients; NOVA 3: processed foods; NOVA 4: ultra-processed foods. Q: quartile.

<sup>a</sup> Model adjusted for age at diagnosis, sex, BMI, smoking status, alcohol consumption, physical activity, total energy intake, cancer stage, cancer site, tumor differentiation, surgery, radiotherapy or chemotherapy, history of cancer in first-degree relatives and a proxy measure of NSAID use.

<sup>b</sup> Test for linear trend was based on the median values for each quartile.

**Table S14** Reclassification of food items for sensitivity analysis.

| <b>Food category</b>                  | <b>Primary analysis</b> | <b>Sensitivity analysis</b> | <b>Rationale for Reclassification</b>                                                    |
|---------------------------------------|-------------------------|-----------------------------|------------------------------------------------------------------------------------------|
| Dairy products (e.g., cheese, yogurt) | NOVA 4                  | NOVA3                       | Can be made at home with minimal ingredients (milk, bacterial cultures, salt).           |
| Soymilk                               | NOVA 4                  | NOVA 3                      | Can be prepared at home using only soybeans and water.                                   |
| Preserved Eggs                        | NOVA 4                  | NOVA 3                      | Traditional methods use only eggs, salt, and ash without synthetic additives.            |
| Preserved Vegetables                  | NOVA 4                  | NOVA 3                      | Traditional preservation relies on fermentation with salt, not industrial preservatives. |
| Milk powder                           | NOVA 4                  | NOVA 1                      | Plain powder is produced solely by dehydrating milk without additives.                   |

Abbreviations: NOVA 1: unprocessed/minimally processed foods; NOVA 2: processed culinary ingredients; NOVA 3: processed foods; NOVA 4: ultra-processed foods.

**Table S15** Hazard ratios (95% confidence intervals) for survival outcomes according to daily intake of NOVA 1–4 food groups (g/day) in the Guangdong Colorectal Cancer Cohort Study (reclassification of food items).

|                                                             | Q1   | Q2                | Q3                | Q4                | <i>P</i> -Trend <sup>b</sup> |
|-------------------------------------------------------------|------|-------------------|-------------------|-------------------|------------------------------|
| <b>Overall survival <sup>a</sup></b>                        |      |                   |                   |                   |                              |
| NOVA 1                                                      | Ref. | 0.89 (0.72, 1.10) | 0.94 (0.75, 1.19) | 0.73 (0.56, 0.97) | 0.061                        |
| NOVA 3                                                      | Ref. | 1.04 (0.84, 1.29) | 0.92 (0.74, 1.15) | 0.90 (0.71, 1.14) | 0.262                        |
| NOVA 4                                                      | Ref. | 0.89 (0.72, 1.12) | 1.01 (0.82, 1.25) | 0.98 (0.78, 1.23) | 0.816                        |
| <b>Colorectal cancer-specific survival <sup>a</sup></b>     |      |                   |                   |                   |                              |
| NOVA 1                                                      | Ref. | 0.89 (0.71, 1.11) | 0.89 (0.70, 1.14) | 0.73 (0.54, 0.97) | 0.047                        |
| NOVA 3                                                      | Ref. | 0.95 (0.76, 1.20) | 0.85 (0.68, 1.08) | 0.84 (0.65, 1.08) | 0.111                        |
| NOVA 4                                                      | Ref. | 0.97 (0.77, 1.23) | 1.05 (0.84, 1.32) | 1.00 (0.79, 1.28) | 0.805                        |
| <b>Recurrence- or metastasis-free survival <sup>a</sup></b> |      |                   |                   |                   |                              |
| NOVA 1                                                      | Ref. | 0.96 (0.75, 1.24) | 1.03 (0.80, 1.33) | 0.83 (0.61, 1.12) | 0.321                        |
| NOVA 3                                                      | Ref. | 1.07 (0.84, 1.36) | 0.99 (0.77, 1.28) | 0.94 (0.71, 1.24) | 0.563                        |
| NOVA 4                                                      | Ref. | 1.00 (0.78, 1.28) | 0.97 (0.76, 1.25) | 1.09 (0.84, 1.40) | 0.563                        |

Abbreviations: NOVA 1: unprocessed/minimally processed foods; NOVA 2: processed culinary ingredients; NOVA 3: processed foods; NOVA 4: ultra-processed foods. Q: quartile.

<sup>a</sup> Model adjusted for age at diagnosis, sex, BMI, smoking status, alcohol consumption, physical activity, total energy intake, cancer stage, cancer site, tumor differentiation, surgery, radiotherapy or chemotherapy, and history of cancer in first-degree relatives.

<sup>b</sup> Test for linear trend was based on the median values for each quartile.

**Table S16** Association of inflammation biomarkers with colorectal cancer prognosis.

|                                                             | Q1   | Q2                | Q3                | Q4                | <i>P</i> -Trend <sup>b</sup> | Continuous<br>(Per SD increase) | <i>P</i> |
|-------------------------------------------------------------|------|-------------------|-------------------|-------------------|------------------------------|---------------------------------|----------|
| <b>Overall survival <sup>a</sup></b>                        |      |                   |                   |                   |                              |                                 |          |
| CRP                                                         | Ref. | 1.06 (0.84, 1.35) | 1.00 (0.79, 1.27) | 1.59 (1.27, 1.99) | <0.001                       | 1.14 (1.08, 1.20)               | <0.001   |
| SII                                                         | Ref. | 0.88 (0.70, 1.11) | 1.15 (0.93, 1.43) | 1.30 (1.05, 1.61) | 0.001                        | 1.28 (1.14, 1.43)               | <0.001   |
| SIRI                                                        | Ref. | 1.11 (0.87, 1.40) | 1.08 (0.85, 1.38) | 1.61 (1.29, 2.01) | <0.001                       | 1.31 (1.18, 1.46)               | <0.001   |
| NLR                                                         | Ref. | 1.01 (0.80, 1.28) | 1.36 (1.09, 1.69) | 1.41 (1.14, 1.76) | <0.001                       | 1.43 (1.23, 1.66)               | <0.001   |
| MLR                                                         | Ref. | 1.01 (0.79, 1.29) | 1.27 (1.00, 1.60) | 1.38 (1.10, 1.71) | <0.001                       | 1.52 (1.29, 1.80)               | <0.001   |
| NMLR                                                        | Ref. | 1.09 (0.86, 1.38) | 1.34 (1.07, 1.68) | 1.49 (1.19, 1.85) | <0.001                       | 1.47 (1.25, 1.71)               | <0.001   |
| <b>Colorectal cancer-specific survival <sup>a</sup></b>     |      |                   |                   |                   |                              |                                 |          |
| CRP                                                         | Ref. | 1.09 (0.85, 1.40) | 1.00 (0.77, 1.28) | 1.56 (1.23, 1.98) | <0.001                       | 1.13 (1.07, 1.20)               | <0.001   |
| SII                                                         | Ref. | 0.87 (0.69, 1.10) | 1.06 (0.84, 1.33) | 1.23 (0.99, 1.54) | 0.015                        | 1.26 (1.11, 1.42)               | <0.001   |
| SIRI                                                        | Ref. | 1.03 (0.80, 1.32) | 1.04 (0.81, 1.33) | 1.50 (1.19, 1.89) | <0.001                       | 1.29 (1.15, 1.44)               | <0.001   |
| NLR                                                         | Ref. | 1.02 (0.79, 1.30) | 1.30 (1.03, 1.65) | 1.39 (1.11, 1.75) | <0.001                       | 1.41 (1.21, 1.65)               | <0.001   |
| MLR                                                         | Ref. | 0.99 (0.76, 1.28) | 1.27 (0.99, 1.63) | 1.38 (1.09, 1.73) | <0.001                       | 1.50 (1.26, 1.79)               | <0.001   |
| NMLR                                                        | Ref. | 1.08 (0.84, 1.38) | 1.29 (1.02, 1.64) | 1.45 (1.15, 1.83) | <0.001                       | 1.44 (1.23, 1.70)               | <0.001   |
| <b>Recurrence- or metastasis-free survival <sup>a</sup></b> |      |                   |                   |                   |                              |                                 |          |
| CRP                                                         | Ref. | 0.97 (0.76, 1.24) | 0.90 (0.70, 1.16) | 1.00 (0.78, 1.28) | 0.894                        | 0.99 (0.93, 1.05)               | 0.777    |
| SII                                                         | Ref. | 0.86 (0.68, 1.10) | 0.98 (0.77, 1.24) | 0.90 (0.71, 1.15) | 0.656                        | 0.98 (0.85, 1.12)               | 0.751    |
| SIRI                                                        | Ref. | 1.01 (0.79, 1.29) | 0.85 (0.67, 1.09) | 0.95 (0.74, 1.22) | 0.418                        | 0.92 (0.81, 1.05)               | 0.210    |
| NLR                                                         | Ref. | 0.95 (0.75, 1.21) | 1.00 (0.79, 1.27) | 0.99 (0.78, 1.26) | 0.943                        | 0.96 (0.80, 1.15)               | 0.691    |
| MLR                                                         | Ref. | 1.03 (0.80, 1.32) | 1.16 (0.91, 1.49) | 0.98 (0.76, 1.25) | 0.990                        | 0.95 (0.78, 1.16)               | 0.609    |
| NMLR                                                        | Ref. | 0.94 (0.73, 1.19) | 1.06 (0.83, 1.34) | 0.99 (0.78, 1.26) | 0.826                        | 0.96 (0.80, 1.16)               | 0.689    |

Abbreviations: CRP, C-reactive protein; SII, Systemic immune-inflammation index; SIRI, Systemic inflammation response index; NLR, Neutrophil-lymphocyte ratio; MLR, Monocyte-lymphocyte ratio; NMLR, Neutrophil-monocyte-lymphocyte ratio. Q: quartile.

<sup>a</sup> Model adjusted for age at diagnosis, sex, BMI, smoking status, alcohol consumption, physical activity, total energy intake, cancer stage, cancer site, tumor differentiation, surgery, radiotherapy or chemotherapy, and family history of cancer in first-degree relatives.

<sup>b</sup> Test for linear trend was based on the median values for each quartile.

**Table S17** Associations between consumption of NOVA 1–4 food groups (g/day) and inflammatory biomarkers.

|                           | Q1   | Q2                   | Q3                   | Q4                   | P-Trend <sup>b</sup> | Continuous<br>(Per SD increase) | P      |
|---------------------------|------|----------------------|----------------------|----------------------|----------------------|---------------------------------|--------|
| <b>NOVA 1<sup>a</sup></b> |      |                      |                      |                      |                      |                                 |        |
| CRP                       | Ref. | -0.15 (-0.30, -0.01) | -0.26 (-0.41, -0.10) | -0.33 (-0.51, -0.15) | <0.001               | -0.12 (-0.19, -0.05)            | <0.001 |
| SII                       | Ref. | -0.04 (-0.11, 0.02)  | -0.07 (-0.14, -0.00) | -0.12 (-0.20, -0.04) | 0.002                | -0.05 (-0.08, -0.02)            | <0.001 |
| SIRI                      | Ref. | -0.02 (-0.10, 0.05)  | -0.05 (-0.12, 0.02)  | -0.11 (-0.19, -0.02) | 0.012                | -0.04 (-0.07, -0.01)            | 0.016  |
| NLR                       | Ref. | -0.01(-0.06, 0.04)   | -0.02(-0.07, 0.03)   | -0.07(-0.13, -0.01)  | 0.037                | -0.03 (-0.05, -0.01)            | 0.006  |
| MLR                       | Ref. | -0.01 (-0.06, 0.04)  | -0.00 (-0.05, 0.05)  | -0.06 (-0.12, -0.01) | 0.052                | -0.02 (-0.04, -0.00)            | 0.048  |
| NMLR                      | Ref. | -0.01(-0.06, 0.03)   | -0.02(-0.07, 0.03)   | -0.07(-0.12, -0.01)  | 0.032                | -0.03 (-0.05, -0.01)            | 0.006  |
| <b>NOVA 2<sup>a</sup></b> |      |                      |                      |                      |                      |                                 |        |
| CRP                       | Ref. | -0.09 (-0.24, 0.06)  | -0.19 (-0.34, -0.05) | -0.14 (-0.28, 0.01)  | 0.031                | -0.02 (-0.07, 0.03)             | 0.499  |
| SII                       | Ref. | 0.01 (-0.06, 0.07)   | 0.07 (0.01, 0.14)    | 0.04 (-0.03, 0.10)   | 0.085                | 0.02 (-0.00, 0.04)              | 0.083  |
| SIRI                      | Ref. | -0.00 (-0.07, 0.07)  | -0.02 (-0.09, 0.05)  | 0.00 (-0.07, 0.07)   | 0.862                | 0.01 (-0.02, 0.03)              | 0.528  |
| NLR                       | Ref. | 0.01 (-0.04, 0.06)   | 0.04 (-0.01, 0.09)   | 0.02 (-0.03, 0.07)   | 0.238                | 0.01 (-0.00, 0.03)              | 0.160  |
| MLR                       | Ref. | 0.01 (-0.04, 0.06)   | -0.02 (-0.06, 0.03)  | 0.01 (-0.04, 0.05)   | 0.992                | 0.01 (-0.01, 0.03)              | 0.281  |
| NMLR                      | Ref. | 0.01 (-0.04, 0.06)   | 0.03 (-0.02, 0.08)   | 0.02 (-0.03, 0.07)   | 0.284                | 0.01 (-0.00, 0.03)              | 0.162  |
| <b>NOVA 3<sup>a</sup></b> |      |                      |                      |                      |                      |                                 |        |
| CRP                       | Ref. | -0.01 (-0.15, 0.14)  | 0.06 (-0.09, 0.21)   | 0.01 (-0.15, 0.17)   | 0.680                | 0.05 (-0.01, 0.11)              | 0.075  |
| SII                       | Ref. | 0.04 (-0.03, 0.10)   | 0.02 (-0.05, 0.08)   | 0.01 (-0.07, 0.08)   | 0.952                | 0.01 (-0.01, 0.04)              | 0.335  |
| SIRI                      | Ref. | 0.03 (-0.04, 0.10)   | 0.01 (-0.06, 0.08)   | -0.01 (-0.09, 0.07)  | 0.730                | 0.00 (-0.03, 0.03)              | 0.877  |
| NLR                       | Ref. | 0.03 (-0.02, 0.07)   | 0.00 (-0.05, 0.05)   | 0.01 (-0.05, 0.06)   | 0.965                | 0.00 (-0.02, 0.02)              | 0.710  |
| MLR                       | Ref. | 0.01 (-0.03, 0.06)   | 0.02 (-0.03, 0.06)   | 0.02 (-0.03, 0.07)   | 0.364                | 0.01 (-0.01, 0.03)              | 0.239  |
| NMLR                      | Ref. | 0.02 (-0.02, 0.07)   | 0.00 (-0.04, 0.05)   | 0.01 (-0.05, 0.06)   | 0.986                | 0.00 (-0.01, 0.02)              | 0.650  |
| <b>NOVA 4<sup>a</sup></b> |      |                      |                      |                      |                      |                                 |        |
| CRP                       | Ref. | 0.03 (-0.11, 0.17)   | -0.06 (-0.21, 0.08)  | 0.05 (-0.11, 0.20)   | 0.860                | 0.01 (-0.04, 0.07)              | 0.651  |

|      |      |                     |                     |                     |       |                     |       |
|------|------|---------------------|---------------------|---------------------|-------|---------------------|-------|
| SII  | Ref. | -0.02 (-0.09, 0.04) | -0.01 (-0.07, 0.06) | -0.00 (-0.07, 0.06) | 0.994 | -0.00 (-0.03, 0.02) | 0.914 |
| SIRI | Ref. | 0.02 (-0.05, 0.09)  | -0.01 (-0.08, 0.06) | 0.01 (-0.07, 0.08)  | 0.986 | -0.01 (-0.03, 0.02) | 0.551 |
| NLR  | Ref. | -0.02 (-0.07, 0.03) | -0.03 (-0.08, 0.02) | -0.04 (-0.09, 0.02) | 0.168 | -0.01 (-0.03, 0.00) | 0.116 |
| MLR  | Ref. | 0.02 (-0.02, 0.07)  | 0.01 (-0.04, 0.05)  | 0.03 (-0.02, 0.08)  | 0.400 | -0.00 (-0.02, 0.02) | 0.937 |
| NMLR | Ref. | -0.02 (-0.07, 0.03) | -0.03 (-0.07, 0.02) | -0.03 (-0.08, 0.02) | 0.234 | -0.01 (-0.03, 0.00) | 0.148 |

Abbreviations: CRP, C-reactive protein; NLR, Neutrophil-lymphocyte ratio; MLR, Monocyte-lymphocyte ratio; NMLR, Neutrophil-monocyte-lymphocyte ratio; SIRI, Systemic inflammation response index; SII, Systemic immune-inflammation index. NOVA 1: unprocessed/minimally processed foods; NOVA 2: processed culinary ingredients; NOVA 3: processed foods; NOVA 4: ultra-processed foods. Q: quartile.

<sup>a</sup> Model adjusted for age at diagnosis, sex, BMI, smoking status, alcohol consumption, physical activity, total energy intake, cancer stage, cancer site, tumor differentiation, surgery, radiotherapy or chemotherapy, and family history of cancer in first-degree relatives.

<sup>b</sup> Test for linear trend was based on the median values for each quartile.

**Table S18** Mediating effects of inflammatory biomarkers on the associations between daily intake of NOVA 1–4 food groups (g/day) and colorectal cancer prognosis.

|                                            | Mediator | Proportion mediated [ %, (95%·CI)] <sup>a</sup> | P     |
|--------------------------------------------|----------|-------------------------------------------------|-------|
| <b>Overall survival</b>                    |          |                                                 |       |
| NOVA 1                                     | CRP      | 9.40 (2.29, 58.6)                               | 0.008 |
|                                            | SII      | 7.89 (0.90, 44.16)                              | 0.036 |
|                                            | SIRI     | 6.73 (0.37, 44.87)                              | 0.044 |
|                                            | NLR      | 6.90 (0.45, 33.95)                              | 0.036 |
|                                            | MLR      | 6.11 (-0.62, 31.7)                              | 0.082 |
|                                            | NMLR     | 7.27 (0.81, 36.11)                              | 0.042 |
| NOVA 2                                     | CRP      | -4.06 (-59.56, 71.99)                           | 0.604 |
|                                            | SII      | 9.98 (-76.79, 89.44)                            | 0.384 |
|                                            | SIRI     | 4.05 (-67.3, 58.07)                             | 0.854 |
|                                            | NLR      | 8.57 (-88.15, 84.43)                            | 0.482 |
|                                            | MLR      | 8.73 (-47.58, 83.42)                            | 0.522 |
|                                            | NMLR     | 9.48 (-64.79, 124.48)                           | 0.414 |
| NOVA 3                                     | CRP      | -7.98 (-60.12, 46.38)                           | 0.288 |
|                                            | SII      | -3.73 (-60.87, 35.68)                           | 0.542 |
|                                            | SIRI     | -0.73 (-29.44, 27.63)                           | 0.998 |
|                                            | NLR      | -1.5 (-64.36, 33.75)                            | 0.762 |
|                                            | MLR      | -6.44 (-65.66, 88.61)                           | 0.488 |
|                                            | NMLR     | -1.94 (-52.77, 33.95)                           | 0.758 |
| NOVA 4                                     | CRP      | -1.59 (-24.9, 23.21)                            | 0.786 |
|                                            | SII      | 0.25 (-24.2, 22.14)                             | 0.882 |
|                                            | SIRI     | 2.10 (-24.01, 31.82)                            | 0.564 |
|                                            | NLR      | 5.70 (-35.73, 49.51)                            | 0.228 |
|                                            | MLR      | 0.14 (-29.61, 24.5)                             | 0.984 |
|                                            | NMLR     | 5.44 (-31.79, 57.7)                             | 0.264 |
| <b>Colorectal cancer-specific survival</b> |          |                                                 |       |
| NOVA 1                                     | CRP      | 8.12 (1.33, 40.64)                              | 0.026 |
|                                            | SII      | 8.27 (0.28, 54.24)                              | 0.044 |
|                                            | SIRI     | 5.58 (0.41, 23.28)                              | 0.028 |
|                                            | NLR      | 6.01 (0.79, 27.82)                              | 0.028 |
|                                            | MLR      | 5.29 (-0.26, 27.38)                             | 0.066 |
|                                            | NMLR     | 6.31 (0.92, 28.00)                              | 0.020 |
| NOVA 2                                     | CRP      | 3.69 (-41.68, 49.31)                            | 0.692 |
|                                            | SII      | 9.2 (-50.43, 113.9)                             | 0.388 |
|                                            | SIRI     | 3.81 (-43.32, 59.83)                            | 0.732 |
|                                            | NLR      | 8.51 (-121.12, 90.45)                           | 0.470 |
|                                            | MLR      | 8.52 (-93.58, 137.28)                           | 0.510 |
|                                            | NMLR     | 8.83 (-94.46, 93.73)                            | 0.476 |
| NOVA 3                                     | CRP      | -4.64 (-25.4, 6.55)                             | 0.134 |
|                                            | SII      | -2.14 (-16.3, 6.51)                             | 0.424 |
|                                            | SIRI     | -0.40 (-12.68, 9.36)                            | 0.840 |

|                                                |      |                         |       |
|------------------------------------------------|------|-------------------------|-------|
|                                                | NLR  | -0.88 (-16.2, 11.41)    | 0.758 |
|                                                | MLR  | -3.57 (-27.31, 6.89)    | 0.284 |
|                                                | NMLR | -1.13 (-14.95, 9.89)    | 0.750 |
| NVOA 4                                         | CRP  | -1.85 (-35.14, 31.31)   | 0.752 |
|                                                | SII  | 0.29 (-38.15, 25.39)    | 0.878 |
|                                                | SIRI | 2.33 (-26.97, 33.38)    | 0.694 |
|                                                | NLR  | 6.62 (-54.46, 72.7)     | 0.298 |
|                                                | MLR  | 0.17 (-37.43, 38.28)    | 0.960 |
|                                                | NMLR | 6.30 (-87.10, 88.18)    | 0.314 |
| <b>Recurrence- or metastasis-free survival</b> |      |                         |       |
| NOVA 1                                         | CRP  | -8.84 (-117.29, 79.06)  | 0.856 |
|                                                | SII  | -2.92 (-90.33, 74.74)   | 0.920 |
|                                                | SIRI | -12.49 (-87.36, 112.04) | 0.732 |
|                                                | NLR  | -3.94 (-55.47, 75.31)   | 0.894 |
|                                                | MLR  | -4.52 (-54.86, 55.98)   | 0.878 |
|                                                | NMLR | -4.07 (-54.29, 64.19)   | 0.912 |
| NOVA 2                                         | CRP  | 6.40 (-34.65, 44.83)    | 0.875 |
|                                                | SII  | -3.19 (-51.75, 55.38)   | 0.990 |
|                                                | SIRI | -8.44 (-69.51, 73.30)   | 1.000 |
|                                                | NLR  | -5.03 (-40.93, 38.68)   | 0.992 |
|                                                | MLR  | -6.61 (-42.16, 33.21)   | 0.954 |
|                                                | NMLR | -5.16 (-33.78, 43.56)   | 0.950 |
| NOVA 3                                         | CRP  | 0.00 (1.59, -15.41)     | 0.648 |
|                                                | SII  | 0.16 (-9.80, 13.51)     | 0.962 |
|                                                | SIRI | 0.32 (-17.21, 13.36)    | 0.878 |
|                                                | NLR  | 0.15 (-9.96, 9.43)      | 0.924 |
|                                                | MLR  | 0.88 (-10.22, 16.49)    | 0.724 |
|                                                | NMLR | 0.20 (-8.98, 7.93)      | 0.976 |
| NVOA 4                                         | CRP  | -0.45 (-13.75, 8.77)    | 0.882 |
|                                                | SII  | 0.01 (-12.87, 8.25)     | 0.886 |
|                                                | SIRI | 0.95 (-20.50, 18.87)    | 0.862 |
|                                                | NLR  | 0.67 (-14.82, 21.8)     | 0.880 |
|                                                | MLR  | -0.07 (-7.70, 10.12)    | 0.966 |
|                                                | NMLR | 0.64 (-14.27, 17.64)    | 0.838 |

Abbreviations: CRP, C-reactive protein; NLR, Neutrophil-lymphocyte ratio; MLR, Monocyte-lymphocyte ratio; NMLR, Neutrophil-monocyte-lymphocyte ratio; SIRI, Systemic inflammation response index; SII, Systemic immune-inflammation index. NOVA 1: unprocessed/minimally processed foods; NOVA 2: processed culinary ingredients; NOVA 3: processed foods; NOVA 4: ultra-processed foods.

<sup>a</sup> Model adjusted for age at diagnosis, sex, BMI, smoking status, alcohol consumption, physical activity, total energy intake, cancer stage, cancer site, tumor differentiation, surgery, radiotherapy or chemotherapy, and family history of cancer in first-degree relatives.

**Table S19** Mediating effects of inflammatory biomarkers on the associations between daily intake of NOVA 1–4 food groups (g/day) and colorectal cancer prognosis (further adjusted for a proxy measure of NSAID use).

|                                            | Mediator | Proportion mediated [ %, (95%-CI)] a | P     |
|--------------------------------------------|----------|--------------------------------------|-------|
| <b>Overall survival</b>                    |          |                                      |       |
| NOVA 1                                     | CRP      | 9.93 (1.19, 60.62)                   | 0.044 |
|                                            | SII      | 8.38 (14.08, 48.55)                  | 0.024 |
|                                            | SIRI     | 6.85 (0.06, 32.53)                   | 0.056 |
|                                            | NLR      | 7.17 (0.31, 34.60)                   | 0.044 |
|                                            | MLR      | 6.10 (0.30, 32.53)                   | 0.062 |
|                                            | NMLR     | 7.52 (1.04, 40.89)                   | 0.024 |
| NOVA 2                                     | CRP      | 3.67 (-50.90, 38.68)                 | 0.696 |
|                                            | SII      | 9.82 (-46.97, 71.57)                 | 0.352 |
|                                            | SIRI     | 4.50 (-83.49, 80.95)                 | 0.816 |
|                                            | NLR      | 9.26 (-101.89, 100.47)               | 0.462 |
|                                            | MLR      | 8.93 (-72.22, 76.57)                 | 0.514 |
|                                            | NMLR     | 9.59 (-67.91, 96.83)                 | 0.454 |
| NOVA 3                                     | CRP      | -8.13 (-77.64, 60.59)                | 0.288 |
|                                            | SII      | -3.82 (-73.12, 44.07)                | 0.584 |
|                                            | SIRI     | -0.01 (-48.11, 38.50)                | 0.960 |
|                                            | NLR      | -1.58 (-30.57, 49.73)                | 0.834 |
|                                            | MLR      | 6.56 (-108.88, 63.45)                | 0.448 |
|                                            | NMLR     | -2.02 (42.84, 34.02)                 | 0.782 |
| NOVA 4                                     | CRP      | -2.09 (-46.68, 32.20)                | 0.650 |
|                                            | SII      | 0.28 (-22.27, 33.77)                 | 0.920 |
|                                            | SIRI     | 1.89 (-24.91, 31.11)                 | 0.686 |
|                                            | NLR      | 5.79 (-38.01, 45.66)                 | 0.264 |
|                                            | MLR      | 0.06 (-22.97, 24.09)                 | 0.998 |
|                                            | NMLR     | 5.50 (-45.39, 67.77)                 | 0.27  |
| <b>Colorectal cancer-specific survival</b> |          |                                      |       |
| NOVA 1                                     | CRP      | 8.56 (1.65, 43.45)                   | 0.020 |
|                                            | SII      | 7.13 (0.79, 34.12)                   | 0.028 |
|                                            | SIRI     | 5.80 (0.17, 26.66)                   | 0.048 |
|                                            | NLR      | 6.29 (0.40, 23.93)                   | 0.032 |
|                                            | MLR      | 5.45 (-0.56, 25.59)                  | 0.074 |
|                                            | NMLR     | 6.59 (0.65, 27.42)                   | 0.032 |
| NOVA 2                                     | CRP      | -3.34 (-62.16, 58.57)                | 0.670 |
|                                            | SII      | 9.06 (-72.07, 108.59)                | 0.420 |
|                                            | SIRI     | 4.04 (-63.38, 53.74)                 | 0.782 |
|                                            | NLR      | 8.66 (-76.40, 88.05)                 | 0.470 |
|                                            | MLR      | 8.44 (-62.73, 61.26)                 | 0.530 |
|                                            | NMLR     | 8.96 (-58.40, 73.96)                 | 0.446 |
| NOVA 3                                     | CRP      | -4.74 (-28.67, 3.64)                 | 0.088 |
|                                            | SII      | -2.19 (-16.52, 6.42)                 | 0.422 |

|                                                |      |                        |       |
|------------------------------------------------|------|------------------------|-------|
|                                                | SIRI | -0.45 (-12.09, 12.46)  | 0.852 |
|                                                | NLR  | -0.92 (-16.46, 0.09)   | 0.744 |
|                                                | MLR  | -3.63 (-31.41, 5.37)   | 0.284 |
|                                                | NMLR | -1.18 (-16.60, 10.09)  | 0.718 |
| NVOA 4                                         | CRP  | -2.43 (-38.31, 40.00)  | 0.706 |
|                                                | SII  | 0.32 (-28.96, 35.84)   | 0.828 |
|                                                | SIRI | 2.12 (-40.02, 49.49)   | 0.722 |
|                                                | NLR  | 6.77 (-52.60, 74.06)   | 0.366 |
|                                                | MLR  | 0.07 (-26.32, 38.73)   | 0.996 |
|                                                | NMLR | 6.43 (-55.41, 66.06)   | 0.398 |
| <b>Recurrence- or metastasis-free survival</b> |      |                        |       |
| NOVA 1                                         | CRP  | -8.58 (-74.29, 66.54)  | 0.736 |
|                                                | SII  | -2.95 (-82.73, 63.89)  | 0.902 |
|                                                | SIRI | -11.93 (-80.87, 87.51) | 0.702 |
|                                                | NLR  | -3.75 (-95.66, 47.48)  | 0.876 |
|                                                | MLR  | -4.17 (-46.26, 47.63)  | 0.878 |
|                                                | NMLR | -3.85 (-46.61, 52.09)  | 0.882 |
| NOVA 2                                         | CRP  | 6.27 (-32.24, 45.49)   | 0.944 |
|                                                | SII  | -3.43 (-45.58, 38.13)  | 0.968 |
|                                                | SIRI | -9.33 (-43.60, 59.54)  | 0.946 |
|                                                | NLR  | -5.25 (-53.22, 35.90)  | 0.996 |
|                                                | MLR  | -6.55 (-37.70, 38.69)  | 0.944 |
|                                                | NMLR | -5.35 (-50.62, 40.44)  | 0.964 |
| NOVA 3                                         | CRP  | 1.60 (-10.93, 22.53)   | 0.642 |
|                                                | SII  | 0.17 (-9.07, 8.08)     | 0.940 |
|                                                | SIRI | 0.35 (-19.23, 20.44)   | 0.884 |
|                                                | NLR  | 0.15 (-8.80, 9.42)     | 0.934 |
|                                                | MLR  | 0.83 (-10.70, 15.40)   | 0.690 |
|                                                | NMLR | 0.19 (-8.10, 12.04)    | 0.928 |
| NVOA 4                                         | CRP  | -0.58 (-16.68, 12.92)  | 0.844 |
|                                                | SII  | 0.01 (-10.63, 14.62)   | 0.982 |
|                                                | SIRI | 0.79 (-11.33, 20.62)   | 0.786 |
|                                                | NLR  | 0.65 (-16.63, 13.22)   | 0.866 |
|                                                | MLR  | -0.08 (-14.12, 10.27)  | 0.938 |
|                                                | NMLR | 0.61 (-13.92, 16.42)   | 0.818 |

Abbreviations: CRP, C-reactive protein; NLR, Neutrophil-lymphocyte ratio; MLR, Monocyte-lymphocyte ratio; NMLR, Neutrophil-monocyte-lymphocyte ratio; SIRI, Systemic inflammation response index; SII, Systemic immune-inflammation index. NOVA 1: unprocessed/minimally processed foods; NOVA 2: processed culinary ingredients; NOVA 3: processed foods; NOVA 4: ultra-processed foods.

<sup>a</sup> Model adjusted for age at diagnosis, sex, BMI, smoking status, alcohol consumption, physical activity, total energy intake, cancer stage, cancer site, tumor differentiation, surgery, radiotherapy or chemotherapy, family history of cancer in first-degree relatives and a proxy measure of NSAID use.

**Table S20** Mediating effects of inflammatory biomarkers on the associations between daily intake of NOVA 1–4 food groups (g/day) and colorectal cancer prognosis (further adjusted for a Dietary Guideline Adherence Score based on the Chinese Dietary Guidelines<sup>a</sup>).

|                                            | Mediator | Proportion mediated [ %. (95%-CI)] <sup>a</sup> | <i>P</i> |
|--------------------------------------------|----------|-------------------------------------------------|----------|
| <b>Overall survival</b>                    |          |                                                 |          |
| NOVA 1                                     | CRP      | 10.03 (1.06, 63.13)                             | 0.038    |
|                                            | SII      | 8.12 (1.03, 45.22)                              | 0.034    |
|                                            | SIRI     | 7.87 (0.97, 52.09)                              | 0.034    |
|                                            | NLR      | 8.60 (1.41, 40.35)                              | 0.028    |
|                                            | MLR      | 7.50 (0.68, 42.44)                              | 0.030    |
|                                            | NMLR     | 9.10 (1.27, 45.12)                              | 0.028    |
| NOVA 2                                     | CRP      | -3.31 (-62.24, 26.48)                           | 0.552    |
|                                            | SII      | 7.93 (-64.83, 145.2)                            | 0.306    |
|                                            | SIRI     | 3.13 (-51.96, 54.96)                            | 0.610    |
|                                            | NLR      | 6.64 (-154.0, 89.36)                            | 0.382    |
|                                            | MLR      | 6.68 (-103.5, 105.5)                            | 0.438    |
|                                            | NMLR     | 6.89 (-78.21, 92.61)                            | 0.400    |
| NOVA 3                                     | CRP      | -6.80 (-67.25, 36.28)                           | 0.158    |
|                                            | SII      | -2.90 (-32.88, 16.91)                           | 0.422    |
|                                            | SIRI     | -0.47 (-30.26, 23.66)                           | 0.912    |
|                                            | NLR      | -1.57 (-22.15, 13.17)                           | 0.660    |
|                                            | MLR      | -5.67 (-93.20, 38.26)                           | 0.352    |
|                                            | NMLR     | -1.53 (-32.37, 17.45)                           | 0.690    |
| NOVA 4                                     | CRP      | -1.80 (-25.88, 18.95)                           | 0.618    |
|                                            | SII      | -0.35 (-30.85, 19.95)                           | 0.918    |
|                                            | SIRI     | 2.03 (-27.16, 26.26)                            | 0.594    |
|                                            | NLR      | 6.12 (-21.99, 81.01)                            | 0.196    |
|                                            | MLR      | 0.42 (-30.11, 24.31)                            | 0.926    |
|                                            | NMLR     | 5.42 (-71.71, 42.21)                            | 0.284    |
| <b>Colorectal cancer-specific survival</b> |          |                                                 |          |
| NOVA 1                                     | CRP      | 8.51 (1.52, 53.41)                              | 0.022    |
|                                            | SII      | 6.80 (1.19, 37.23)                              | 0.032    |
|                                            | SIRI     | 6.56 (0.53, 35.99)                              | 0.040    |
|                                            | NLR      | 7.40 (1.18, 35.98)                              | 0.036    |
|                                            | MLR      | 6.58 (0.46, 33.31)                              | 0.034    |
|                                            | NMLR     | 7.80 (1.21, 34.87)                              | 0.016    |
| NOVA 2                                     | CRP      | -2.50 (-41.66, 65.68)                           | 0.608    |
|                                            | SII      | 6.20 (-64.24, 85.46)                            | 0.342    |
|                                            | SIRI     | 2.09 (-68.97, 57.00)                            | 0.680    |
|                                            | NLR      | 6.52 (-53.45, 71.46)                            | 0.402    |
|                                            | MLR      | 5.69 (-56.45, 67.19)                            | 0.484    |
|                                            | NMLR     | 5.73 (-121.2, 77.01)                            | 0.442    |
| NOVA 3                                     | CRP      | -4.35 (-24.15, 0.38)                            | 0.068    |

|                                                |      |                        |       |
|------------------------------------------------|------|------------------------|-------|
|                                                | SII  | -1.89 (-12.37, 3.48)   | 0.386 |
|                                                | SIRI | -0.42 (-8.99, 6.57)    | 0.854 |
|                                                | NLR  | -0.92 (-11.83, 4.69)   | 0.690 |
|                                                | MLR  | -3.49 (-22.25, 3.29)   | 0.246 |
|                                                | NMLR | -1.03 (-11.40, 4.99)   | 0.650 |
| NVOA 4                                         | CRP  | -2.07 (-39.58, 32.97)  | 0.636 |
|                                                | SII  | -0.16 (-34.46, 22.14)  | 0.958 |
|                                                | SIRI | 1.75 (-45.43, 34.10)   | 0.710 |
|                                                | NLR  | 5.44 (-60.70, 56.07)   | 0.340 |
|                                                | MLR  | 0.58 (-33.27, 36.98)   | 0.900 |
|                                                | NMLR | 5.84 (-72.19, 75.31)   | 0.332 |
| <b>Recurrence- or metastasis-free survival</b> |      |                        |       |
| NOVA 1                                         | CRP  | -0.03 (-154.70, 73.13) | 0.998 |
|                                                | SII  | -0.06 (-88.15, 63.18)  | 0.99  |
|                                                | SIRI | 1.71 (-81.10, 136.13)  | 0.872 |
|                                                | NLR  | 0.02 (-87.45, 79.42)   | 0.996 |
|                                                | MLR  | -0.04 (-85.16, 67.73)  | 0.994 |
|                                                | NMLR | 0.56 (-77.81, 64.64)   | 0.936 |
| NOVA 2                                         | CRP  | -0.00 (-30.69, 32.17)  | 0.996 |
|                                                | SII  | 0.02 (-42.65, 34.19)   | 0.984 |
|                                                | SIRI | 0.02 (-58.35, 45.73)   | 0.972 |
|                                                | NLR  | -0.14 (-59.89, 47.04)  | 0.936 |
|                                                | MLR  | -0.05 (-40.43, 29.16)  | 0.964 |
|                                                | NMLR | -0.03 (-44.33, 35.38)  | 0.978 |
| NOVA 3                                         | CRP  | 1.04 (-14.44, 24.20)   | 0.62  |
|                                                | SII  | 0.03 (-9.752, 8.67)    | 0.942 |
|                                                | SIRI | 0.05 (-16.96, 13.31)   | 0.93  |
|                                                | NLR  | 0.01 (-7.03, 6.58)     | 0.956 |
|                                                | MLR  | 0.29 (-12.10, 14.70)   | 0.756 |
|                                                | NMLR | 0.03 (-8.54, 10.00)    | 0.936 |
| NVOA 4                                         | CRP  | -0.19 (-9.94, 8.39)    | 0.804 |
|                                                | SII  | -0.01 (-6.90, 5.20)    | 0.96  |
|                                                | SIRI | 0.35 (-7.73, 15.69)    | 0.736 |
|                                                | NLR  | 0.20 (-13.36, 14.08)   | 0.836 |
|                                                | MLR  | -0.02 (-6.87, 6.15)    | 0.968 |
|                                                | NMLR | 0.21 (-10.26, 11.28)   | 0.816 |

Abbreviations: CRP, C-reactive protein; NLR, Neutrophil-lymphocyte ratio; MLR, Monocyte-lymphocyte ratio; NMLR, Neutrophil-monocyte-lymphocyte ratio; SIRI, Systemic inflammation response index; SII, Systemic immune-inflammation index. NOVA 1: unprocessed/minimally processed foods; NOVA 2: processed culinary ingredients; NOVA 3: processed foods; NOVA 4: ultra-processed foods.

<sup>a</sup> Model adjusted for age at diagnosis, sex, BMI, smoking status, alcohol consumption, physical activity, total energy intake, cancer stage, cancer site, tumor differentiation, surgery, radiotherapy or chemotherapy, family history of cancer in first-degree relatives, and a Dietary Guideline Adherence Score based on the Chinese Dietary Guidelines.
